# Supplementary material for: DNA methylation-mediated modulation of rapid desiccation tolerance acquisition and dehydration stress memory in the resurrection plant Boea hygrometrica
Source: PLoS Genet. 2021 Apr 30;17(4):e1009549. doi: 10.1371/journal.pgen.1009549 (PMC8115786; doi:10.1371/journal.pgen.1009549)
Supplement: S1 Table. Summary of the transcriptome sequencing data — (XLSX) [file pgen.1009549.s013.xlsx]

## Sheet: Sheet1
Filtered Sequencing Reads (AVERAGE)		Genome Mapping (AVERAGE)		Novel Transcript		Gene Expression (AVERAGE)
Total Raw Reads (Mb)	52.63	Total Clean Reads	44014375	Total Novel Transcript	23892	Total Clean Reads	43960087
Total Clean Reads (Mb)	43.85	Total Mapping Ratio (%)	0.7279	Coding Transcript	19449	Total Mapping Ratio (%)	0.6286
Total Clean Bases (Gb)	6.58	Uniquely Mapping Ratio (%)	0.6824	Noncoding Transcript	4443	Total Gene Number	17933
Clean Reads Q20 (%)	98.42			Novel Isoform	17210	Known Gene Number	16311
Clean Reads Q30 (%)	94.9			Novel Gene	2239	Novel Gene Number	1621
Clean Reads Ratio (%)	83.37					Total Transcript Number	31434
						Known Transcript Number	12531
						Novel Transcript Number	18903
