# Supplementary material for: DNA methylation-mediated modulation of rapid desiccation tolerance acquisition and dehydration stress memory in the resurrection plant Boea hygrometrica
Source: PLoS Genet. 2021 Apr 30;17(4):e1009549. doi: 10.1371/journal.pgen.1009549 (PMC8115786; doi:10.1371/journal.pgen.1009549)
Supplement: S3 Table. Summary of the WGBS data — (XLSX) [file pgen.1009549.s015.xlsx]

## Sheet: Sheet1
Samples	Raw reads	Q30(%)	Raw bases (Gb)	Clean bases (Gb)	Clean rate	Alignment reads	Alignment rate	Conversion rate	genome coverage
F	365863716	85.36	54.88	53.3	0.9712	300389723	0.8454	>99%	30.329
SD	355097052	86.12	53.26	50.94	0.9564	297914798	0.8773	>99%	30.0798
A	350896358	86.32	52.63	50.31	0.9558	293953249	0.8764	>99%	29.6773
AD	353061484	83.97	52.96	50.04	0.9449	268252404	0.8041	>99%	27.0829
A4	384776008	83.24	57.72	54.32	0.9412	264068608	0.7292	>99%	26.6609
F4	354797170	84.73	53.22	50.69	0.9525	293474679	0.8684	>99%	29.6285
A4D	351367086	86.52	52.71	49.57	0.9405	279240618	0.845	>99%	28.1931
F4D	359448816	84.4	53.92	51.29	0.9513	294695317	0.8619	>99%	29.7548
A18	354929578	83.43	53.24	50.44	0.9474	287814378	0.8559	>99%	29.058
F18	351347792	83.54	52.7	49.96	0.948	278939584	0.8375	>99%	28.1628
A18D	350171744	85.3	52.53	50.8	0.9671	291927685	0.862	>99%	29.474
F18D	352488238	84.11	52.87	50.5	0.9551	289052192	0.8586	>99%	29.1844
Average	3.5702e+08	84.7533	53.5533	51.0133	0.952617	2.86644e+08	0.843475		28.9617
