# Supplementary material for: DNA methylation-mediated modulation of rapid desiccation tolerance acquisition and dehydration stress memory in the resurrection plant Boea hygrometrica
Source: PLoS Genet. 2021 Apr 30;17(4):e1009549. doi: 10.1371/journal.pgen.1009549 (PMC8115786; doi:10.1371/journal.pgen.1009549)
Supplement: S5 Table. GO enrichment analysis of acclimation-related MRGs — (XLSX) [file pgen.1009549.s017.xlsx]

## Sheet: GO Biological Process
GO ID	Description	out (56)	All (6970)	pvalue	p.adjust	Genes
GO:1902589	single-organism organelle organization	3	61	0.0127246	0.747273	F511_00649;F511_02195;F511_29285
GO:0030029	actin filament-based process	2	26	0.018213	0.747273	F511_02195;F511_29285
GO:0030036	actin cytoskeleton organization	2	26	0.018213	0.747273	F511_02195;F511_29285
GO:0045226	extracellular polysaccharide biosynthetic process	1	3	0.0239136	0.747273	F511_13626
GO:0046379	extracellular polysaccharide metabolic process	1	3	0.0239136	0.747273	F511_13626
GO:0005975	carbohydrate metabolic process	9	536	0.0257751	0.747273	F511_00586;F511_02547;F511_03581;F511_04048;F511_05036;F511_13626;F511_15939;F511_17945;F511_38977
GO:0006188	IMP biosynthetic process	1	4	0.0317592	0.747273	F511_26291
GO:0046040	IMP metabolic process	1	4	0.0317592	0.747273	F511_26291
GO:0007010	cytoskeleton organization	2	36	0.0335506	0.747273	F511_02195;F511_29285
GO:0007154	cell communication	5	237	0.0408001	0.747273	F511_05690;F511_07151;F511_10499;F511_14331;F511_28655
GO:0016575	histone deacetylation	1	6	0.0472652	0.747273	F511_00649
GO:0005985	sucrose metabolic process	1	7	0.0549265	0.747273	F511_02547
GO:0007205	protein kinase C-activating G-protein coupled receptor signaling pathway	1	9	0.070068	0.747273	F511_07151
GO:0016567	protein ubiquitination	2	57	0.0764408	0.747273	F511_03899;F511_12875
GO:0006476	protein deacetylation	1	10	0.0775491	0.747273	F511_00649
GO:0016485	protein processing	1	10	0.0775491	0.747273	F511_00058
GO:0035601	protein deacylation	1	10	0.0775491	0.747273	F511_00649
GO:0051604	protein maturation	1	10	0.0775491	0.747273	F511_00058
GO:0098732	macromolecule deacylation	1	10	0.0775491	0.747273	F511_00649
GO:0032446	protein modification by small protein conjugation	2	58	0.0787745	0.747273	F511_03899;F511_12875
GO:0070647	protein modification by small protein conjugation or removal	2	58	0.0787745	0.747273	F511_03899;F511_12875
GO:0007165	signal transduction	4	213	0.0910526	0.747273	F511_05690;F511_07151;F511_14331;F511_28655
GO:0023052	signaling	4	213	0.0910526	0.747273	F511_05690;F511_07151;F511_14331;F511_28655
GO:0044700	single organism signaling	4	213	0.0910526	0.747273	F511_05690;F511_07151;F511_14331;F511_28655
GO:0006298	mismatch repair	1	12	0.0923345	0.747273	F511_19635
GO:0009765	photosynthesis, light harvesting	1	12	0.0923345	0.747273	F511_22923
GO:0006508	proteolysis	6	397	0.0973184	0.747273	F511_00058;F511_00272;F511_13542;F511_20123;F511_27943;F511_36050
GO:0051716	cellular response to stimulus	5	307	0.0990096	0.747273	F511_05690;F511_07151;F511_14331;F511_19635;F511_28655
GO:0006006	glucose metabolic process	1	13	0.0996397	0.747273	F511_03581
GO:0019684	photosynthesis, light reaction	1	13	0.0996397	0.747273	F511_22923
GO:0001522	pseudouridine synthesis	1	14	0.106887	0.747273	F511_00851
GO:0016569	covalent chromatin modification	1	14	0.106887	0.747273	F511_00649
GO:0016570	histone modification	1	14	0.106887	0.747273	F511_00649
GO:0007186	G-protein coupled receptor signaling pathway	1	16	0.12121	0.747273	F511_07151
GO:0019538	protein metabolic process	19	1830	0.124737	0.747273	F511_00058;F511_00248;F511_00272;F511_00569;F511_00649;F511_00968;F511_02195;F511_03899;F511_08443;F511_10098;F511_10499;F511_12875;F511_13542;F511_17867;F511_20123;F511_22751;F511_23083;F511_27943;F511_36050
GO:0008037	cell recognition	1	17	0.128287	0.747273	F511_10499
GO:0009856	pollination	1	17	0.128287	0.747273	F511_10499
GO:0009875	pollen-pistil interaction	1	17	0.128287	0.747273	F511_10499
GO:0044706	multi-multicellular organism process	1	17	0.128287	0.747273	F511_10499
GO:0048544	recognition of pollen	1	17	0.128287	0.747273	F511_10499
GO:0044702	single organism reproductive process	1	18	0.135308	0.768946	F511_10499
GO:0044703	multi-organism reproductive process	1	21	0.156039	0.790454	F511_10499
GO:0051704	multi-organism process	1	21	0.156039	0.790454	F511_10499
GO:0044238	primary metabolic process	35	3840	0.162619	0.790454	F511_00058;F511_00248;F511_00272;F511_00569;F511_00586;F511_00649;F511_00851;F511_00968;F511_02195;F511_02547;F511_03142;F511_03581;F511_03899;F511_04048;F511_05036;F511_08443;F511_10098;F511_10499;F511_12508;F511_12875;F511_13542;F511_13626;F511_15939;F511_17317;F511_17867;F511_17945;F511_19635;F511_20123;F511_22751;F511_23083;F511_26291;F511_26294;F511_27943;F511_36050;F511_38977
GO:0000003	reproduction	1	22	0.16284	0.790454	F511_10499
GO:0005984	disaccharide metabolic process	1	22	0.16284	0.790454	F511_02547
GO:0006397	mRNA processing	1	22	0.16284	0.790454	F511_12508
GO:0022414	reproductive process	1	22	0.16284	0.790454	F511_10499
GO:0006996	organelle organization	3	179	0.173387	0.824474	F511_00649;F511_02195;F511_29285
GO:0009311	oligosaccharide metabolic process	1	26	0.189511	0.87836	F511_02547
GO:0006887	exocytosis	1	27	0.196047	0.87836	F511_11463
GO:0016071	mRNA metabolic process	1	27	0.196047	0.87836	F511_12508
GO:0006413	translational initiation	1	28	0.202532	0.87836	F511_08443
GO:0032940	secretion by cell	1	29	0.208965	0.87836	F511_11463
GO:0046903	secretion	1	29	0.208965	0.87836	F511_11463
GO:0006720	isoprenoid metabolic process	1	30	0.215347	0.87836	F511_26294
GO:0008299	isoprenoid biosynthetic process	1	30	0.215347	0.87836	F511_26294
GO:0016568	chromatin modification	1	31	0.221678	0.87836	F511_00649
GO:0043412	macromolecule modification	11	1062	0.225272	0.87836	F511_00248;F511_00569;F511_00649;F511_00851;F511_02195;F511_03899;F511_10098;F511_10499;F511_12875;F511_17867;F511_23083
GO:0009451	RNA modification	1	32	0.22796	0.87836	F511_00851
GO:0044262	cellular carbohydrate metabolic process	2	113	0.229957	0.87836	F511_02547;F511_13626
GO:0044723	single-organism carbohydrate metabolic process	3	215	0.24853	0.907075	F511_02547;F511_03581;F511_13626
GO:0071704	organic substance metabolic process	35	3981	0.24895	0.907075	F511_00058;F511_00248;F511_00272;F511_00569;F511_00586;F511_00649;F511_00851;F511_00968;F511_02195;F511_02547;F511_03142;F511_03581;F511_03899;F511_04048;F511_05036;F511_08443;F511_10098;F511_10499;F511_12508;F511_12875;F511_13542;F511_13626;F511_15939;F511_17317;F511_17867;F511_17945;F511_19635;F511_20123;F511_22751;F511_23083;F511_26291;F511_26294;F511_27943;F511_36050;F511_38977
GO:0006352	DNA-templated transcription, initiation	1	36	0.252591	0.907075	F511_08443
GO:0050896	response to stimulus	7	641	0.253047	0.907075	F511_05690;F511_07151;F511_11043;F511_14331;F511_19635;F511_26417;F511_28655
GO:0015979	photosynthesis	1	38	0.264615	0.934172	F511_22923
GO:0044763	single-organism cellular process	18	1931	0.271266	0.941417	F511_00649;F511_02195;F511_02547;F511_04039;F511_05690;F511_07151;F511_10499;F511_11463;F511_13626;F511_14331;F511_17317;F511_19635;F511_20766;F511_26291;F511_26294;F511_26417;F511_28655;F511_29285
GO:0019318	hexose metabolic process	1	41	0.282297	0.941417	F511_03581
GO:0032501	multicellular organismal process	1	41	0.282297	0.941417	F511_10499
GO:0006913	nucleocytoplasmic transport	1	43	0.293851	0.941417	F511_28655
GO:0051169	nuclear transport	1	43	0.293851	0.941417	F511_28655
GO:0000271	polysaccharide biosynthetic process	1	44	0.29956	0.941417	F511_13626
GO:0033692	cellular polysaccharide biosynthetic process	1	44	0.29956	0.941417	F511_13626
GO:0006464	cellular protein modification process	10	1024	0.303031	0.941417	F511_00248;F511_00569;F511_00649;F511_02195;F511_03899;F511_10098;F511_10499;F511_12875;F511_17867;F511_23083
GO:0036211	protein modification process	10	1024	0.303031	0.941417	F511_00248;F511_00569;F511_00649;F511_02195;F511_03899;F511_10098;F511_10499;F511_12875;F511_17867;F511_23083
GO:0044267	cellular protein metabolic process	14	1503	0.312743	0.958804	F511_00248;F511_00272;F511_00569;F511_00649;F511_00968;F511_02195;F511_03899;F511_08443;F511_10098;F511_10499;F511_12875;F511_17867;F511_22751;F511_23083
GO:0035556	intracellular signal transduction	2	147	0.331444	0.980283	F511_14331;F511_28655
GO:0005996	monosaccharide metabolic process	1	50	0.332873	0.980283	F511_03581
GO:0006470	protein dephosphorylation	1	52	0.343627	0.980283	F511_00569
GO:0016311	dephosphorylation	1	54	0.354211	0.980283	F511_00569
GO:0000160	phosphorelay signal transduction system	1	55	0.359441	0.980283	F511_14331
GO:0034637	cellular carbohydrate biosynthetic process	1	60	0.384968	0.980283	F511_13626
GO:0044264	cellular polysaccharide metabolic process	1	66	0.414285	0.980283	F511_13626
GO:0016051	carbohydrate biosynthetic process	1	68	0.423749	0.980283	F511_13626
GO:0044711	single-organism biosynthetic process	4	421	0.440692	0.980283	F511_13626;F511_17317;F511_26291;F511_26294
GO:0009127	purine nucleoside monophosphate biosynthetic process	1	72	0.442229	0.980283	F511_26291
GO:0009168	purine ribonucleoside monophosphate biosynthetic process	1	72	0.442229	0.980283	F511_26291
GO:0007264	small GTPase mediated signal transduction	1	73	0.446757	0.980283	F511_28655
GO:0044257	cellular protein catabolic process	1	73	0.446757	0.980283	F511_00272
GO:0051603	proteolysis involved in cellular protein catabolic process	1	73	0.446757	0.980283	F511_00272
GO:0043170	macromolecule metabolic process	24	2869	0.448231	0.980283	F511_00058;F511_00248;F511_00272;F511_00569;F511_00649;F511_00851;F511_00968;F511_02195;F511_03142;F511_03899;F511_08443;F511_10098;F511_10499;F511_12508;F511_12875;F511_13542;F511_13626;F511_17867;F511_19635;F511_20123;F511_22751;F511_23083;F511_27943;F511_36050
GO:0005976	polysaccharide metabolic process	1	74	0.451249	0.980283	F511_13626
GO:0016482	cytoplasmic transport	1	74	0.451249	0.980283	F511_28655
GO:0016043	cellular component organization	3	310	0.457127	0.980283	F511_00649;F511_02195;F511_29285
GO:0030163	protein catabolic process	1	76	0.460126	0.980283	F511_00272
GO:0009124	nucleoside monophosphate biosynthetic process	1	78	0.468862	0.980283	F511_26291
GO:0009152	purine ribonucleotide biosynthetic process	1	78	0.468862	0.980283	F511_26291
GO:0009156	ribonucleoside monophosphate biosynthetic process	1	78	0.468862	0.980283	F511_26291
GO:0006164	purine nucleotide biosynthetic process	1	80	0.477459	0.980283	F511_26291
GO:0009260	ribonucleotide biosynthetic process	1	80	0.477459	0.980283	F511_26291
GO:0044265	cellular macromolecule catabolic process	1	80	0.477459	0.980283	F511_00272
GO:0046390	ribose phosphate biosynthetic process	1	80	0.477459	0.980283	F511_26291
GO:0051649	establishment of localization in cell	2	199	0.478256	0.980283	F511_11463;F511_28655
GO:0008152	metabolic process	43	5265	0.485819	0.980283	F511_00058;F511_00248;F511_00272;F511_00569;F511_00586;F511_00649;F511_00851;F511_00968;F511_02195;F511_02547;F511_03142;F511_03581;F511_03899;F511_04048;F511_05029;F511_05036;F511_05827;F511_06661;F511_08443;F511_10098;F511_10499;F511_11320;F511_12508;F511_12875;F511_13542;F511_13626;F511_14837;F511_15803;F511_15939;F511_17317;F511_17867;F511_17945;F511_18415;F511_19635;F511_20123;F511_22751;F51…
GO:0072522	purine-containing compound biosynthetic process	1	84	0.494244	0.980283	F511_26291
GO:0006091	generation of precursor metabolites and energy	1	85	0.498358	0.980283	F511_22923
GO:0006915	apoptotic process	1	85	0.498358	0.980283	F511_26417
GO:0012501	programmed cell death	1	85	0.498358	0.980283	F511_26417
GO:0006950	response to stress	3	334	0.507102	0.980283	F511_11043;F511_19635;F511_26417
GO:0009165	nucleotide biosynthetic process	1	89	0.514484	0.980283	F511_26291
GO:0051641	cellular localization	2	213	0.514543	0.980283	F511_11463;F511_28655
GO:0044237	cellular metabolic process	27	3333	0.529032	0.980283	F511_00248;F511_00272;F511_00569;F511_00649;F511_00851;F511_00968;F511_02195;F511_02547;F511_03142;F511_03899;F511_04048;F511_08443;F511_10098;F511_10499;F511_12508;F511_12875;F511_13626;F511_14837;F511_15803;F511_17317;F511_17867;F511_19635;F511_22751;F511_22923;F511_23083;F511_26291;F511_26294
GO:0071840	cellular component organization or biogenesis	3	346	0.531235	0.980283	F511_00649;F511_02195;F511_29285
GO:0006281	DNA repair	1	94	0.533927	0.980283	F511_19635
GO:0006325	chromatin organization	1	95	0.537723	0.980283	F511_00649
GO:0006974	cellular response to DNA damage stimulus	1	95	0.537723	0.980283	F511_19635
GO:0016192	vesicle-mediated transport	1	95	0.537723	0.980283	F511_11463
GO:0033554	cellular response to stress	1	95	0.537723	0.980283	F511_19635
GO:1901293	nucleoside phosphate biosynthetic process	1	96	0.541488	0.980283	F511_26291
GO:1901566	organonitrogen compound biosynthetic process	5	608	0.546967	0.980283	F511_00968;F511_08443;F511_17317;F511_22751;F511_26291
GO:0006412	translation	3	358	0.554729	0.980283	F511_00968;F511_08443;F511_22751
GO:0008652	cellular amino acid biosynthetic process	1	100	0.556251	0.980283	F511_17317
GO:0009987	cellular process	37	4605	0.561909	0.980283	F511_00248;F511_00272;F511_00569;F511_00649;F511_00851;F511_00968;F511_02195;F511_02547;F511_03142;F511_03899;F511_04039;F511_04048;F511_05146;F511_05690;F511_07151;F511_08443;F511_10098;F511_10499;F511_11463;F511_12508;F511_12875;F511_13626;F511_14331;F511_14837;F511_15803;F511_17317;F511_17867;F511_19635;F511_20766;F511_22751;F511_22923;F511_23083;F511_26291;F511_26294;F511_26417;F511_28655;F51…
GO:0043043	peptide biosynthetic process	3	362	0.562411	0.980283	F511_00968;F511_08443;F511_22751
GO:0008219	cell death	1	102	0.563456	0.980283	F511_26417
GO:0016265	death	1	102	0.563456	0.980283	F511_26417
GO:0009057	macromolecule catabolic process	1	104	0.570547	0.980283	F511_00272
GO:0006518	peptide metabolic process	3	369	0.575669	0.980283	F511_00968;F511_08443;F511_22751
GO:0006952	defense response	1	106	0.577524	0.980283	F511_26417
GO:0006468	protein phosphorylation	6	769	0.594054	0.980283	F511_00248;F511_02195;F511_10098;F511_10499;F511_17867;F511_23083
GO:0043604	amide biosynthetic process	3	382	0.599647	0.980283	F511_00968;F511_08443;F511_22751
GO:0051276	chromosome organization	1	116	0.610775	0.980283	F511_00649
GO:0043603	cellular amide metabolic process	3	393	0.619261	0.980283	F511_00968;F511_08443;F511_22751
GO:0044699	single-organism process	23	2943	0.619578	0.980283	F511_00649;F511_02195;F511_02547;F511_03581;F511_04039;F511_05029;F511_05690;F511_05827;F511_06661;F511_07151;F511_10499;F511_11463;F511_13626;F511_14331;F511_17317;F511_18415;F511_19635;F511_20766;F511_26291;F511_26294;F511_26417;F511_28655;F511_29285
GO:0044248	cellular catabolic process	1	122	0.629476	0.980283	F511_00272
GO:0008610	lipid biosynthetic process	1	124	0.635512	0.980283	F511_26294
GO:0090407	organophosphate biosynthetic process	1	126	0.641451	0.980283	F511_26291
GO:0050794	regulation of cellular process	6	813	0.650268	0.980283	F511_03142;F511_05690;F511_07151;F511_08443;F511_14331;F511_28655
GO:0009126	purine nucleoside monophosphate metabolic process	1	132	0.658704	0.980283	F511_26291
GO:0009167	purine ribonucleoside monophosphate metabolic process	1	132	0.658704	0.980283	F511_26291
GO:0006796	phosphate-containing compound metabolic process	8	1083	0.65894	0.980283	F511_00248;F511_00569;F511_02195;F511_10098;F511_10499;F511_17867;F511_23083;F511_26291
GO:0006793	phosphorus metabolic process	8	1085	0.661094	0.980283	F511_00248;F511_00569;F511_02195;F511_10098;F511_10499;F511_17867;F511_23083;F511_26291
GO:0006396	RNA processing	1	135	0.667022	0.980283	F511_12508
GO:0009123	nucleoside monophosphate metabolic process	1	138	0.67514	0.980283	F511_26291
GO:0009161	ribonucleoside monophosphate metabolic process	1	138	0.67514	0.980283	F511_26291
GO:1901137	carbohydrate derivative biosynthetic process	1	138	0.67514	0.980283	F511_26291
GO:0016310	phosphorylation	6	838	0.680151	0.980283	F511_00248;F511_02195;F511_10098;F511_10499;F511_17867;F511_23083
GO:0043933	macromolecular complex subunit organization	1	143	0.688242	0.980283	F511_00649
GO:0044260	cellular macromolecule metabolic process	19	2528	0.689814	0.980283	F511_00248;F511_00272;F511_00569;F511_00649;F511_00851;F511_00968;F511_02195;F511_03142;F511_03899;F511_08443;F511_10098;F511_10499;F511_12508;F511_12875;F511_13626;F511_17867;F511_19635;F511_22751;F511_23083
GO:0009150	purine ribonucleotide metabolic process	1	145	0.693335	0.980283	F511_26291
GO:0006163	purine nucleotide metabolic process	1	147	0.698348	0.980283	F511_26291
GO:0009259	ribonucleotide metabolic process	1	147	0.698348	0.980283	F511_26291
GO:0050789	regulation of biological process	6	856	0.700679	0.980283	F511_03142;F511_05690;F511_07151;F511_08443;F511_14331;F511_28655
GO:0044255	cellular lipid metabolic process	1	149	0.703279	0.980283	F511_26294
GO:0006886	intracellular protein transport	1	150	0.705715	0.980283	F511_28655
GO:0072521	purine-containing compound metabolic process	1	152	0.710529	0.980283	F511_26291
GO:0019693	ribose phosphate metabolic process	1	159	0.726774	0.980283	F511_26291
GO:0065007	biological regulation	6	882	0.728824	0.980283	F511_03142;F511_05690;F511_07151;F511_08443;F511_14331;F511_28655
GO:0016053	organic acid biosynthetic process	1	162	0.733459	0.980283	F511_17317
GO:0046394	carboxylic acid biosynthetic process	1	162	0.733459	0.980283	F511_17317
GO:0034613	cellular protein localization	1	164	0.737827	0.980283	F511_28655
GO:0070727	cellular macromolecule localization	1	164	0.737827	0.980283	F511_28655
GO:0009117	nucleotide metabolic process	1	170	0.750511	0.980283	F511_26291
GO:0046907	intracellular transport	1	170	0.750511	0.980283	F511_28655
GO:0006457	protein folding	1	171	0.752565	0.980283	F511_05146
GO:0044710	single-organism metabolic process	12	1730	0.7683	0.980283	F511_00649;F511_02547;F511_03581;F511_05029;F511_05827;F511_06661;F511_13626;F511_17317;F511_18415;F511_19635;F511_26291;F511_26294
GO:0006753	nucleoside phosphate metabolic process	1	180	0.770325	0.980283	F511_26291
GO:1901575	organic substance catabolic process	1	181	0.772219	0.980283	F511_00272
GO:0044283	small molecule biosynthetic process	1	183	0.775961	0.980283	F511_17317
GO:1901564	organonitrogen compound metabolic process	5	806	0.791735	0.980283	F511_00968;F511_08443;F511_17317;F511_22751;F511_26291
GO:0009056	catabolic process	1	192	0.792069	0.980283	F511_00272
GO:0055114	oxidation-reduction process	5	812	0.797258	0.980283	F511_03581;F511_05029;F511_05827;F511_06661;F511_18415
GO:0055086	nucleobase-containing small molecule metabolic process	1	197	0.80052	0.980283	F511_26291
GO:0006812	cation transport	1	205	0.813346	0.980283	F511_20766
GO:0015031	protein transport	1	208	0.817944	0.980283	F511_28655
GO:0045184	establishment of protein localization	1	213	0.82536	0.980283	F511_28655
GO:0006810	transport	6	1005	0.837496	0.980283	F511_04039;F511_05975;F511_11463;F511_19198;F511_20766;F511_28655
GO:0006520	cellular amino acid metabolic process	1	222	0.83797	0.980283	F511_17317
GO:0008104	protein localization	1	224	0.840649	0.980283	F511_28655
GO:0051234	establishment of localization	6	1010	0.841083	0.980283	F511_04039;F511_05975;F511_11463;F511_19198;F511_20766;F511_28655
GO:0051179	localization	6	1021	0.848758	0.980283	F511_04039;F511_05975;F511_11463;F511_19198;F511_20766;F511_28655
GO:0019637	organophosphate metabolic process	1	242	0.862877	0.980283	F511_26291
GO:0006811	ion transport	1	251	0.87282	0.980283	F511_20766
GO:0010467	gene expression	6	1062	0.874836	0.980283	F511_00058;F511_00968;F511_03142;F511_08443;F511_12508;F511_22751
GO:0033036	macromolecule localization	1	254	0.875974	0.980283	F511_28655
GO:1901135	carbohydrate derivative metabolic process	1	261	0.883037	0.980283	F511_26291
GO:0016070	RNA metabolic process	4	784	0.889128	0.980283	F511_00851;F511_03142;F511_08443;F511_12508
GO:0006259	DNA metabolic process	1	268	0.889705	0.980283	F511_19635
GO:0055085	transmembrane transport	2	457	0.890437	0.980283	F511_04039;F511_20766
GO:0006629	lipid metabolic process	1	273	0.894238	0.980283	F511_26294
GO:0044281	small molecule metabolic process	3	639	0.898486	0.980283	F511_03581;F511_17317;F511_26291
GO:0034654	nucleobase-containing compound biosynthetic process	3	666	0.913855	0.980283	F511_03142;F511_08443;F511_26291
GO:0071702	organic substance transport	1	319	0.92822	0.980283	F511_28655
GO:0009058	biosynthetic process	9	1624	0.93082	0.980283	F511_00968;F511_02547;F511_03142;F511_08443;F511_13626;F511_17317;F511_22751;F511_26291;F511_26294
GO:0044249	cellular biosynthetic process	8	1480	0.931049	0.980283	F511_00968;F511_03142;F511_08443;F511_13626;F511_17317;F511_22751;F511_26291;F511_26294
GO:0044765	single-organism transport	3	710	0.934517	0.980283	F511_04039;F511_11463;F511_20766
GO:1901576	organic substance biosynthetic process	8	1497	0.936531	0.980283	F511_00968;F511_03142;F511_08443;F511_13626;F511_17317;F511_22751;F511_26291;F511_26294
GO:0090304	nucleic acid metabolic process	5	1043	0.93658	0.980283	F511_00851;F511_03142;F511_08443;F511_12508;F511_19635
GO:0006355	regulation of transcription, DNA-templated	2	539	0.937923	0.980283	F511_03142;F511_08443
GO:0051252	regulation of RNA metabolic process	2	539	0.937923	0.980283	F511_03142;F511_08443
GO:1903506	regulation of nucleic acid-templated transcription	2	539	0.937923	0.980283	F511_03142;F511_08443
GO:2001141	regulation of RNA biosynthetic process	2	539	0.937923	0.980283	F511_03142;F511_08443
GO:0019219	regulation of nucleobase-containing compound metabolic process	2	541	0.938797	0.980283	F511_03142;F511_08443
GO:1902578	single-organism localization	3	724	0.940089	0.980283	F511_04039;F511_11463;F511_20766
GO:0010468	regulation of gene expression	2	546	0.940931	0.980283	F511_03142;F511_08443
GO:0009889	regulation of biosynthetic process	2	547	0.94135	0.980283	F511_03142;F511_08443
GO:0010556	regulation of macromolecule biosynthetic process	2	547	0.94135	0.980283	F511_03142;F511_08443
GO:0031326	regulation of cellular biosynthetic process	2	547	0.94135	0.980283	F511_03142;F511_08443
GO:0051171	regulation of nitrogen compound metabolic process	2	547	0.94135	0.980283	F511_03142;F511_08443
GO:2000112	regulation of cellular macromolecule biosynthetic process	2	547	0.94135	0.980283	F511_03142;F511_08443
GO:0031323	regulation of cellular metabolic process	2	548	0.941766	0.980283	F511_03142;F511_08443
GO:0080090	regulation of primary metabolic process	2	549	0.942179	0.980283	F511_03142;F511_08443
GO:0060255	regulation of macromolecule metabolic process	2	550	0.942589	0.980283	F511_03142;F511_08443
GO:0019438	aromatic compound biosynthetic process	3	733	0.943441	0.980283	F511_03142;F511_08443;F511_26291
GO:0018130	heterocycle biosynthetic process	3	739	0.945581	0.980283	F511_03142;F511_08443;F511_26291
GO:0006351	transcription, DNA-templated	2	567	0.949163	0.980283	F511_03142;F511_08443
GO:0097659	nucleic acid-templated transcription	2	567	0.949163	0.980283	F511_03142;F511_08443
GO:0044271	cellular nitrogen compound biosynthetic process	5	1084	0.949616	0.980283	F511_00968;F511_03142;F511_08443;F511_22751;F511_26291
GO:0032774	RNA biosynthetic process	2	569	0.949888	0.980283	F511_03142;F511_08443
GO:1901362	organic cyclic compound biosynthetic process	3	763	0.953425	0.980283	F511_03142;F511_08443;F511_26291
GO:0019752	carboxylic acid metabolic process	1	371	0.953835	0.980283	F511_17317
GO:0043436	oxoacid metabolic process	1	371	0.953835	0.980283	F511_17317
GO:0006082	organic acid metabolic process	1	372	0.954227	0.980283	F511_17317
GO:0034645	cellular macromolecule biosynthetic process	5	1105	0.955333	0.980283	F511_00968;F511_03142;F511_08443;F511_13626;F511_22751
GO:0006139	nucleobase-containing compound metabolic process	6	1265	0.955813	0.980283	F511_00851;F511_03142;F511_08443;F511_12508;F511_19635;F511_26291
GO:0009059	macromolecule biosynthetic process	5	1107	0.955846	0.980283	F511_00968;F511_03142;F511_08443;F511_13626;F511_22751
GO:0019222	regulation of metabolic process	2	591	0.957254	0.980283	F511_03142;F511_08443
GO:0034641	cellular nitrogen compound metabolic process	8	1649	0.971175	0.980283	F511_00851;F511_00968;F511_03142;F511_08443;F511_12508;F511_19635;F511_22751;F511_26291
GO:0046483	heterocycle metabolic process	6	1351	0.972924	0.980283	F511_00851;F511_03142;F511_08443;F511_12508;F511_19635;F511_26291
GO:0006725	cellular aromatic compound metabolic process	6	1352	0.973082	0.980283	F511_00851;F511_03142;F511_08443;F511_12508;F511_19635;F511_26291
GO:0006807	nitrogen compound metabolic process	9	1832	0.976011	0.980283	F511_00851;F511_00968;F511_03142;F511_08443;F511_12508;F511_17317;F511_19635;F511_22751;F511_26291
GO:1901360	organic cyclic compound metabolic process	6	1372	0.976076	0.980283	F511_00851;F511_03142;F511_08443;F511_12508;F511_19635;F511_26291
GO:0008150	biological_process	56	6970	1	1	F511_00058;F511_00248;F511_00272;F511_00569;F511_00586;F511_00649;F511_00851;F511_00968;F511_02195;F511_02547;F511_03142;F511_03581;F511_03899;F511_04039;F511_04048;F511_05029;F511_05036;F511_05146;F511_05690;F511_05827;F511_05975;F511_06661;F511_07151;F511_08443;F511_10098;F511_10499;F511_11043;F511_11320;F511_11463;F511_12508;F511_12875;F511_13542;F511_13626;F511_14331;F511_14837;F511_15803;F51…

## Sheet: GO Cellular Component
GO ID	Description	out (19)	All (3260)	pvalue	p.adjust	Genes
GO:0000151	ubiquitin ligase complex	2	66	0.0553311	0.472694	F511_03899;F511_12875
GO:0005839	proteasome core complex	1	19	0.105391	0.472694	F511_00272
GO:1902494	catalytic complex	3	200	0.106828	0.472694	F511_00569;F511_03899;F511_12875
GO:0000502	proteasome complex	1	22	0.121038	0.472694	F511_00272
GO:0043234	protein complex	5	465	0.122411	0.472694	F511_00272;F511_00569;F511_03899;F511_11463;F511_12875
GO:0000145	exocyst	1	23	0.126195	0.472694	F511_11463
GO:0005938	cell cortex	1	23	0.126195	0.472694	F511_11463
GO:0044448	cell cortex part	1	23	0.126195	0.472694	F511_11463
GO:0099568	cytoplasmic region	1	23	0.126195	0.472694	F511_11463
GO:1990234	transferase complex	2	111	0.135055	0.472694	F511_03899;F511_12875
GO:0032991	macromolecular complex	6	741	0.249315	0.686775	F511_00272;F511_00569;F511_00968;F511_03899;F511_11463;F511_12875
GO:0008287	protein serine/threonine phosphatase complex	1	50	0.255088	0.686775	F511_00569
GO:1903293	phosphatase complex	1	50	0.255088	0.686775	F511_00569
GO:0005623	cell	13	2083	0.440519	0.972862	F511_00272;F511_00569;F511_00968;F511_03899;F511_05690;F511_05975;F511_11463;F511_12508;F511_12875;F511_17574;F511_19198;F511_19331;F511_28655
GO:0044464	cell part	13	2083	0.440519	0.972862	F511_00272;F511_00569;F511_00968;F511_03899;F511_05690;F511_05975;F511_11463;F511_12508;F511_12875;F511_17574;F511_19198;F511_19331;F511_28655
GO:0005622	intracellular	12	1928	0.456849	0.972862	F511_00272;F511_00968;F511_03899;F511_05690;F511_05975;F511_11463;F511_12508;F511_12875;F511_17574;F511_19198;F511_19331;F511_28655
GO:0016021	integral component of membrane	3	457	0.510201	0.972862	F511_00058;F511_04039;F511_05975
GO:0031224	intrinsic component of membrane	3	464	0.52112	0.972862	F511_00058;F511_04039;F511_05975
GO:0071944	cell periphery	1	126	0.528125	0.972862	F511_11463
GO:0044425	membrane part	3	599	0.706299	1	F511_00058;F511_04039;F511_05975
GO:0016020	membrane	7	1349	0.734435	1	F511_00058;F511_04039;F511_05975;F511_18146;F511_20766;F511_22923;F511_34998
GO:0005840	ribosome	1	233	0.756588	1	F511_00968
GO:0030529	intracellular ribonucleoprotein complex	1	261	0.796095	1	F511_00968
GO:1990904	ribonucleoprotein complex	1	261	0.796095	1	F511_00968
GO:0044444	cytoplasmic part	2	525	0.835523	1	F511_00968;F511_11463
GO:0005634	nucleus	2	542	0.849493	1	F511_12508;F511_17574
GO:0044424	intracellular part	7	1502	0.851059	1	F511_00272;F511_00968;F511_03899;F511_11463;F511_12508;F511_12875;F511_17574
GO:0043228	non-membrane-bounded organelle	1	391	0.912375	1	F511_00968
GO:0043232	intracellular non-membrane-bounded organelle	1	391	0.912375	1	F511_00968
GO:0005737	cytoplasm	2	723	0.945772	1	F511_00968;F511_11463
GO:0043227	membrane-bounded organelle	2	759	0.956439	1	F511_12508;F511_17574
GO:0043231	intracellular membrane-bounded organelle	2	759	0.956439	1	F511_12508;F511_17574
GO:0043226	organelle	3	1081	0.975419	1	F511_00968;F511_12508;F511_17574
GO:0043229	intracellular organelle	3	1081	0.975419	1	F511_00968;F511_12508;F511_17574
GO:0005575	cellular_component	19	3260	1	1	F511_00058;F511_00272;F511_00569;F511_00968;F511_03899;F511_04039;F511_05690;F511_05975;F511_11463;F511_12508;F511_12875;F511_17574;F511_18146;F511_19198;F511_19331;F511_20766;F511_22923;F511_28655;F511_34998

## Sheet: GO Molecular Function
GO ID	Description	out (79)	All (9940)	pvalue	p.adjust	Genes
GO:0004421	hydroxymethylglutaryl-CoA synthase activity	1	1	0.00794769	0.404331	F511_26294
GO:0016811	hydrolase activity, acting on carbon-nitrogen (but not peptide) bonds, in linear amides	2	20	0.010801	0.404331	F511_00649;F511_22751
GO:0004018	N6-(1,2-dicarboxyethyl)AMP AMP-lyase (fumarate-forming) activity	1	2	0.015833	0.404331	F511_26291
GO:0004476	mannose-6-phosphate isomerase activity	1	3	0.0236564	0.404331	F511_00586
GO:0004765	shikimate kinase activity	1	3	0.0236564	0.404331	F511_21588
GO:0008831	dTDP-4-dehydrorhamnose reductase activity	1	3	0.0236564	0.404331	F511_13626
GO:0004197	cysteine-type endopeptidase activity	2	31	0.0249893	0.404331	F511_20123;F511_36050
GO:0003779	actin binding	2	35	0.0313316	0.404331	F511_02195;F511_29285
GO:0004345	glucose-6-phosphate dehydrogenase activity	1	4	0.0314184	0.404331	F511_03581
GO:0016842	amidine-lyase activity	1	4	0.0314184	0.404331	F511_26291
GO:0042586	peptide deformylase activity	1	4	0.0314184	0.404331	F511_22751
GO:0008092	cytoskeletal protein binding	2	36	0.0330067	0.404331	F511_02195;F511_29285
GO:0016810	hydrolase activity, acting on carbon-nitrogen (but not peptide) bonds	2	38	0.0364594	0.404338	F511_00649;F511_22751
GO:0008234	cysteine-type peptidase activity	2	43	0.0456614	0.404338	F511_20123;F511_36050
GO:0004175	endopeptidase activity	5	247	0.0464636	0.404338	F511_00272;F511_13542;F511_20123;F511_27943;F511_36050
GO:0004407	histone deacetylase activity	1	6	0.0467601	0.404338	F511_00649
GO:0033558	protein deacetylase activity	1	6	0.0467601	0.404338	F511_00649
GO:0019213	deacetylase activity	1	7	0.0543408	0.443783	F511_00649
GO:0004143	diacylglycerol kinase activity	1	9	0.0693239	0.454008	F511_07151
GO:0004842	ubiquitin-protein transferase activity	2	60	0.0821708	0.454008	F511_03899;F511_12875
GO:0019787	ubiquitin-like protein transferase activity	2	60	0.0821708	0.454008	F511_03899;F511_12875
GO:0004721	phosphoprotein phosphatase activity	2	62	0.0869152	0.454008	F511_00569;F511_12508
GO:0016787	hydrolase activity	20	1858	0.0884693	0.454008	F511_00272;F511_00569;F511_00649;F511_03066;F511_03900;F511_05036;F511_06511;F511_11326;F511_12508;F511_13542;F511_15939;F511_16943;F511_17945;F511_20123;F511_22751;F511_23098;F511_27943;F511_28655;F511_36050;F511_38977
GO:0003690	double-stranded DNA binding	1	12	0.0913602	0.454008	F511_19635
GO:0004559	alpha-mannosidase activity	1	12	0.0913602	0.454008	F511_38977
GO:0030983	mismatched DNA binding	1	12	0.0913602	0.454008	F511_19635
GO:0015923	mannosidase activity	1	13	0.0985905	0.454008	F511_38977
GO:0046912	transferase activity, transferring acyl groups, acyl groups converted into alkyl on transfer	1	13	0.0985905	0.454008	F511_26294
GO:0016853	isomerase activity	3	141	0.101747	0.454008	F511_00586;F511_00851;F511_04048
GO:0016791	phosphatase activity	2	72	0.111776	0.454008	F511_00569;F511_12508
GO:0009982	pseudouridine synthase activity	1	16	0.119942	0.454008	F511_00851
GO:0016857	racemase and epimerase activity, acting on carbohydrates and derivatives	1	16	0.119942	0.454008	F511_04048
GO:0016655	oxidoreductase activity, acting on NAD(P)H, quinone or similar compound as acceptor	1	17	0.126948	0.454008	F511_05029
GO:0016854	racemase and epimerase activity	1	17	0.126948	0.454008	F511_04048
GO:0016861	intramolecular oxidoreductase activity, interconverting aldoses and ketoses	1	17	0.126948	0.454008	F511_00586
GO:0004857	enzyme inhibitor activity	2	80	0.132826	0.454008	F511_03900;F511_23707
GO:0008080	N-acetyltransferase activity	1	18	0.133899	0.454008	F511_17317
GO:0004298	threonine-type endopeptidase activity	1	19	0.140795	0.454008	F511_00272
GO:0004866	endopeptidase inhibitor activity	1	19	0.140795	0.454008	F511_23707
GO:0030414	peptidase inhibitor activity	1	19	0.140795	0.454008	F511_23707
GO:0061134	peptidase regulator activity	1	19	0.140795	0.454008	F511_23707
GO:0061135	endopeptidase regulator activity	1	19	0.140795	0.454008	F511_23707
GO:0070003	threonine-type peptidase activity	1	19	0.140795	0.454008	F511_00272
GO:0016616	oxidoreductase activity, acting on the CH-OH group of donors, NAD or NADP as acceptor	2	84	0.143669	0.454008	F511_03581;F511_13626
GO:0016410	N-acyltransferase activity	1	20	0.147636	0.454008	F511_17317
GO:0016860	intramolecular oxidoreductase activity	1	20	0.147636	0.454008	F511_00586
GO:0070011	peptidase activity, acting on L-amino acid peptides	5	352	0.147762	0.454008	F511_00272;F511_13542;F511_20123;F511_27943;F511_36050
GO:0050662	coenzyme binding	4	261	0.153493	0.454008	F511_03581;F511_04048;F511_05827;F511_14837
GO:0016407	acetyltransferase activity	1	21	0.154424	0.454008	F511_17317
GO:0016840	carbon-nitrogen lyase activity	1	21	0.154424	0.454008	F511_26291
GO:0010181	FMN binding	1	22	0.161159	0.457009	F511_05827
GO:0008233	peptidase activity	5	363	0.161663	0.457009	F511_00272;F511_13542;F511_20123;F511_27943;F511_36050
GO:0016746	transferase activity, transferring acyl groups	3	179	0.17012	0.471843	F511_17317;F511_17578;F511_26294
GO:0004553	hydrolase activity, hydrolyzing O-glycosyl compounds	4	276	0.176467	0.480381	F511_05036;F511_15939;F511_17945;F511_38977
GO:0016798	hydrolase activity, acting on glycosyl bonds	4	287	0.194028	0.487709	F511_05036;F511_15939;F511_17945;F511_38977
GO:0003824	catalytic activity	47	5376	0.196492	0.487709	F511_00248;F511_00272;F511_00569;F511_00586;F511_00649;F511_00851;F511_02195;F511_03066;F511_03581;F511_03899;F511_03900;F511_04048;F511_05029;F511_05036;F511_05827;F511_05842;F511_06511;F511_06661;F511_07151;F511_10098;F511_10499;F511_11320;F511_11326;F511_12508;F511_12875;F511_13542;F511_13626;F511_14837;F511_15939;F511_16943;F511_17317;F511_17578;F511_17867;F511_17945;F511_18415;F511_18538;F51…
GO:0016614	oxidoreductase activity, acting on CH-OH group of donors	2	103	0.197287	0.487709	F511_03581;F511_13626
GO:0042578	phosphoric ester hydrolase activity	2	103	0.197287	0.487709	F511_00569;F511_12508
GO:0016651	oxidoreductase activity, acting on NAD(P)H	1	28	0.200469	0.487709	F511_05029
GO:0050661	NADP binding	1	28	0.200469	0.487709	F511_03581
GO:0005515	protein binding	21	2198	0.202383	0.487709	F511_00511;F511_00806;F511_01253;F511_01982;F511_02195;F511_03581;F511_04455;F511_05146;F511_05690;F511_06275;F511_06306;F511_08283;F511_08976;F511_10600;F511_14948;F511_16703;F511_17574;F511_23757;F511_24172;F511_29285;F511_31840
GO:0003743	translation initiation factor activity	1	29	0.206841	0.490413	F511_08443
GO:0030234	enzyme regulator activity	2	111	0.220571	0.513899	F511_03900;F511_23707
GO:0008270	zinc ion binding	10	954	0.223738	0.513899	F511_00586;F511_01982;F511_06275;F511_06306;F511_08443;F511_11326;F511_19331;F511_23098;F511_23757;F511_38977
GO:0004722	protein serine/threonine phosphatase activity	1	37	0.256047	0.57906	F511_00569
GO:0098772	molecular function regulator	2	129	0.273602	0.609386	F511_03900;F511_23707
GO:0016866	intramolecular transferase activity	1	45	0.302236	0.663116	F511_00851
GO:0048037	cofactor binding	4	353	0.308269	0.666405	F511_03581;F511_04048;F511_05827;F511_14837
GO:0046914	transition metal ion binding	12	1314	0.349225	0.744002	F511_00586;F511_01982;F511_06275;F511_06306;F511_06661;F511_08443;F511_11326;F511_19331;F511_22751;F511_23098;F511_23757;F511_38977
GO:0008135	translation factor activity, RNA binding	1	55	0.356009	0.747619	F511_08443
GO:0016747	transferase activity, transferring acyl groups other than amino-acyl groups	2	159	0.361369	0.748186	F511_17317;F511_17578
GO:0004190	aspartic-type endopeptidase activity	1	63	0.396063	0.797551	F511_13542
GO:0070001	aspartic-type peptidase activity	1	63	0.396063	0.797551	F511_13542
GO:0016301	kinase activity	8	885	0.406405	0.807318	F511_00248;F511_02195;F511_07151;F511_10098;F511_10499;F511_17867;F511_21588;F511_23083
GO:0016773	phosphotransferase activity, alcohol group as acceptor	8	891	0.41388	0.811205	F511_00248;F511_02195;F511_07151;F511_10098;F511_10499;F511_17867;F511_21588;F511_23083
GO:0003723	RNA binding	3	313	0.455487	0.878801	F511_00851;F511_01344;F511_08443
GO:0030599	pectinesterase activity	1	77	0.460324	0.878801	F511_03900
GO:0046983	protein dimerization activity	2	205	0.487353	0.911538	F511_01253;F511_17574
GO:0031072	heat shock protein binding	1	84	0.489874	0.911538	F511_05146
GO:0004252	serine-type endopeptidase activity	1	87	0.502044	0.922506	F511_27943
GO:0004674	protein serine/threonine kinase activity	6	722	0.51653	0.930758	F511_00248;F511_02195;F511_10098;F511_10499;F511_17867;F511_23083
GO:0008026	ATP-dependent helicase activity	1	93	0.52553	0.930758	F511_16943
GO:0070035	purine NTP-dependent helicase activity	1	93	0.52553	0.930758	F511_16943
GO:0052689	carboxylic ester hydrolase activity	1	104	0.565782	0.964349	F511_03900
GO:0005506	iron ion binding	2	240	0.572514	0.964349	F511_06661;F511_22751
GO:0046872	metal ion binding	12	1547	0.584633	0.964349	F511_00586;F511_01982;F511_06275;F511_06306;F511_06661;F511_08443;F511_11326;F511_19331;F511_22751;F511_23098;F511_23757;F511_38977
GO:0003924	GTPase activity	1	110	0.586297	0.964349	F511_28655
GO:0004672	protein kinase activity	6	775	0.587668	0.964349	F511_00248;F511_02195;F511_10098;F511_10499;F511_17867;F511_23083
GO:0043169	cation binding	12	1559	0.59612	0.964349	F511_00586;F511_01982;F511_06275;F511_06306;F511_06661;F511_08443;F511_11326;F511_19331;F511_22751;F511_23098;F511_23757;F511_38977
GO:0051082	unfolded protein binding	1	113	0.596192	0.964349	F511_05146
GO:0004871	signal transducer activity	1	119	0.615287	0.964349	F511_14331
GO:0016788	hydrolase activity, acting on ester bonds	3	399	0.620074	0.964349	F511_00569;F511_03900;F511_12508
GO:0016772	transferase activity, transferring phosphorus-containing groups	8	1083	0.64083	0.964349	F511_00248;F511_02195;F511_07151;F511_10098;F511_10499;F511_17867;F511_21588;F511_23083
GO:0016740	transferase activity	14	1894	0.663625	0.964349	F511_00248;F511_02195;F511_03899;F511_07151;F511_10098;F511_10499;F511_12875;F511_17317;F511_17578;F511_17867;F511_18538;F511_21588;F511_23083;F511_26294
GO:0004386	helicase activity	1	137	0.667382	0.964349	F511_16943
GO:0008236	serine-type peptidase activity	1	142	0.680573	0.964349	F511_27943
GO:0017171	serine hydrolase activity	1	142	0.680573	0.964349	F511_27943
GO:0016829	lyase activity	1	152	0.705424	0.964349	F511_26291
GO:0016491	oxidoreductase activity	7	1037	0.730455	0.964349	F511_03581;F511_05029;F511_05827;F511_05842;F511_06661;F511_13626;F511_18415
GO:0032553	ribonucleotide binding	13	1854	0.735689	0.964349	F511_00248;F511_02195;F511_05827;F511_06511;F511_10098;F511_10499;F511_16943;F511_17867;F511_19635;F511_21588;F511_23083;F511_26417;F511_28655
GO:0022891	substrate-specific transmembrane transporter activity	2	330	0.743394	0.964349	F511_04039;F511_20766
GO:0097367	carbohydrate derivative binding	13	1876	0.751706	0.964349	F511_00248;F511_02195;F511_05827;F511_06511;F511_10098;F511_10499;F511_16943;F511_17867;F511_19635;F511_21588;F511_23083;F511_26417;F511_28655
GO:0008168	methyltransferase activity	1	179	0.763384	0.964349	F511_18538
GO:0008324	cation transmembrane transporter activity	1	179	0.763384	0.964349	F511_20766
GO:0000166	nucleotide binding	14	2028	0.764481	0.964349	F511_00248;F511_02195;F511_03581;F511_05827;F511_06511;F511_10098;F511_10499;F511_16943;F511_17867;F511_19635;F511_21588;F511_23083;F511_26417;F511_28655
GO:1901265	nucleoside phosphate binding	14	2028	0.764481	0.964349	F511_00248;F511_02195;F511_03581;F511_05827;F511_06511;F511_10098;F511_10499;F511_16943;F511_17867;F511_19635;F511_21588;F511_23083;F511_26417;F511_28655
GO:0005525	GTP binding	1	183	0.770953	0.964349	F511_28655
GO:0032561	guanyl ribonucleotide binding	1	183	0.770953	0.964349	F511_28655
GO:0019001	guanyl nucleotide binding	1	187	0.778282	0.964349	F511_28655
GO:0005524	ATP binding	11	1652	0.783974	0.964349	F511_00248;F511_02195;F511_06511;F511_10098;F511_10499;F511_16943;F511_17867;F511_19635;F511_21588;F511_23083;F511_26417
GO:0032559	adenyl ribonucleotide binding	11	1652	0.783974	0.964349	F511_00248;F511_02195;F511_06511;F511_10098;F511_10499;F511_16943;F511_17867;F511_19635;F511_21588;F511_23083;F511_26417
GO:0030554	adenyl nucleotide binding	11	1655	0.786037	0.964349	F511_00248;F511_02195;F511_06511;F511_10098;F511_10499;F511_16943;F511_17867;F511_19635;F511_21588;F511_23083;F511_26417
GO:0016741	transferase activity, transferring one-carbon groups	1	192	0.787119	0.964349	F511_18538
GO:0022892	substrate-specific transporter activity	2	366	0.793659	0.964349	F511_04039;F511_20766
GO:0004497	monooxygenase activity	1	196	0.793938	0.964349	F511_06661
GO:0036094	small molecule binding	14	2076	0.795405	0.964349	F511_00248;F511_02195;F511_03581;F511_05827;F511_06511;F511_10098;F511_10499;F511_16943;F511_17867;F511_19635;F511_21588;F511_23083;F511_26417;F511_28655
GO:0043167	ion binding	25	3548	0.807613	0.964349	F511_00248;F511_00586;F511_01982;F511_02195;F511_05827;F511_06275;F511_06306;F511_06511;F511_06661;F511_08443;F511_10098;F511_10499;F511_11326;F511_16943;F511_17867;F511_19331;F511_19635;F511_21588;F511_22751;F511_23083;F511_23098;F511_23757;F511_26417;F511_28655;F511_38977
GO:0001883	purine nucleoside binding	12	1833	0.812714	0.964349	F511_00248;F511_02195;F511_06511;F511_10098;F511_10499;F511_16943;F511_17867;F511_19635;F511_21588;F511_23083;F511_26417;F511_28655
GO:0032550	purine ribonucleoside binding	12	1833	0.812714	0.964349	F511_00248;F511_02195;F511_06511;F511_10098;F511_10499;F511_16943;F511_17867;F511_19635;F511_21588;F511_23083;F511_26417;F511_28655
GO:0032555	purine ribonucleotide binding	12	1833	0.812714	0.964349	F511_00248;F511_02195;F511_06511;F511_10098;F511_10499;F511_16943;F511_17867;F511_19635;F511_21588;F511_23083;F511_26417;F511_28655
GO:0035639	purine ribonucleoside triphosphate binding	12	1833	0.812714	0.964349	F511_00248;F511_02195;F511_06511;F511_10098;F511_10499;F511_16943;F511_17867;F511_19635;F511_21588;F511_23083;F511_26417;F511_28655
GO:0017076	purine nucleotide binding	12	1840	0.816932	0.964349	F511_00248;F511_02195;F511_06511;F511_10098;F511_10499;F511_16943;F511_17867;F511_19635;F511_21588;F511_23083;F511_26417;F511_28655
GO:0001882	nucleoside binding	12	1843	0.818719	0.964349	F511_00248;F511_02195;F511_06511;F511_10098;F511_10499;F511_16943;F511_17867;F511_19635;F511_21588;F511_23083;F511_26417;F511_28655
GO:0032549	ribonucleoside binding	12	1843	0.818719	0.964349	F511_00248;F511_02195;F511_06511;F511_10098;F511_10499;F511_16943;F511_17867;F511_19635;F511_21588;F511_23083;F511_26417;F511_28655
GO:0022857	transmembrane transporter activity	2	414	0.847233	0.964349	F511_04039;F511_20766
GO:0003735	structural constituent of ribosome	1	233	0.847614	0.964349	F511_00968
GO:0042623	ATPase activity, coupled	1	233	0.847614	0.964349	F511_16943
GO:0020037	heme binding	1	241	0.857261	0.964349	F511_06661
GO:0046906	tetrapyrrole binding	1	241	0.857261	0.964349	F511_06661
GO:0005215	transporter activity	3	605	0.867476	0.964349	F511_04039;F511_05975;F511_20766
GO:0017111	nucleoside-triphosphatase activity	3	623	0.880326	0.964349	F511_06511;F511_16943;F511_28655
GO:0043168	anion binding	13	2108	0.882586	0.964349	F511_00248;F511_02195;F511_05827;F511_06511;F511_10098;F511_10499;F511_16943;F511_17867;F511_19635;F511_21588;F511_23083;F511_26417;F511_28655
GO:0016462	pyrophosphatase activity	3	633	0.886985	0.964349	F511_06511;F511_16943;F511_28655
GO:0016818	hydrolase activity, acting on acid anhydrides, in phosphorus-containing anhydrides	3	638	0.890191	0.964349	F511_06511;F511_16943;F511_28655
GO:0015075	ion transmembrane transporter activity	1	275	0.891963	0.964349	F511_20766
GO:0005198	structural molecule activity	1	277	0.893722	0.964349	F511_00968
GO:0016817	hydrolase activity, acting on acid anhydrides	3	652	0.898747	0.964349	F511_06511;F511_16943;F511_28655
GO:0009055	electron carrier activity	1	309	0.918309	0.974648	F511_06661
GO:0016887	ATPase activity	1	314	0.921606	0.974648	F511_16943
GO:0005488	binding	46	6541	0.937043	0.983895	F511_00248;F511_00511;F511_00586;F511_00806;F511_00851;F511_01253;F511_01344;F511_01982;F511_02195;F511_03581;F511_04048;F511_04455;F511_05146;F511_05690;F511_05827;F511_06275;F511_06306;F511_06511;F511_06661;F511_08283;F511_08443;F511_08976;F511_10098;F511_10499;F511_10600;F511_11326;F511_14837;F511_14948;F511_16703;F511_16943;F511_17574;F511_17867;F511_19331;F511_19635;F511_21588;F511_22751;F51…
GO:0001071	nucleic acid binding transcription factor activity	1	451	0.974855	1	F511_03142
GO:0003700	transcription factor activity, sequence-specific DNA binding	1	451	0.974855	1	F511_03142
GO:0003676	nucleic acid binding	7	1759	0.991464	1	F511_00851;F511_01344;F511_08443;F511_16943;F511_19635;F511_23757;F511_31722
GO:0097159	organic cyclic compound binding	20	3875	0.996404	1	F511_00248;F511_00851;F511_01344;F511_02195;F511_03581;F511_05827;F511_06511;F511_06661;F511_08443;F511_10098;F511_10499;F511_16943;F511_17867;F511_19635;F511_21588;F511_23083;F511_23757;F511_26417;F511_28655;F511_31722
GO:1901363	heterocyclic compound binding	20	3875	0.996404	1	F511_00248;F511_00851;F511_01344;F511_02195;F511_03581;F511_05827;F511_06511;F511_06661;F511_08443;F511_10098;F511_10499;F511_16943;F511_17867;F511_19635;F511_21588;F511_23083;F511_23757;F511_26417;F511_28655;F511_31722
GO:0003677	DNA binding	1	1063	0.999873	1	F511_19635
GO:0003674	molecular_function	79	9940	1	1	F511_00248;F511_00272;F511_00511;F511_00569;F511_00586;F511_00649;F511_00806;F511_00851;F511_00968;F511_01253;F511_01344;F511_01982;F511_02195;F511_03066;F511_03142;F511_03581;F511_03899;F511_03900;F511_04039;F511_04048;F511_04455;F511_05029;F511_05036;F511_05146;F511_05690;F511_05827;F511_05842;F511_05975;F511_06275;F511_06306;F511_06511;F511_06661;F511_07151;F511_08283;F511_08443;F511_08976;F51…
