# Supplementary material for: DNA methylation-mediated modulation of rapid desiccation tolerance acquisition and dehydration stress memory in the resurrection plant Boea hygrometrica
Source: PLoS Genet. 2021 Apr 30;17(4):e1009549. doi: 10.1371/journal.pgen.1009549 (PMC8115786; doi:10.1371/journal.pgen.1009549)
Supplement: S9 Table. List of the putative methylation-regulated short-term and mid-term dehydration stress memory genes — (XLSX) [file pgen.1009549.s021.xlsx]

## Sheet: Sheet1
category	gene_id	locus_tag	protein	chr	start	end	product	GO annotation			Kegg Orthology	Nr Description
								Cellular Component	Molecular Function	Biological Process
putative methylation-regulated short-term dehydration stress memory genes	lcl|KQ988202.1_mrna_2441	F511_00301	KZV56304.1	KQ988202.1	276458	283381	F-box protein	NA	NA	NA	K11323//histone arginine demethylase JMJD6 [EC:1.14.11.-]	gi|747055903|ref|XP_011074201.1|//PREDICTED: F-box protein At1g78280 isoform X1 [Sesamum indicum]
	lcl|KV014884.1_mrna_37355	F511_08283	KZV21518.1	KV014884.1	509025	518768	CLIP-associated protein	GO:0009524//phragmoplast;GO:0005938//cell cortex;GO:0009506//plasmodesma;GO:0005886//plasma membrane;GO:0005876//spindle microtubule	GO:0051010//microtubule plus-end binding	GO:0043622//cortical microtubule organization;GO:0007026//negative regulation of microtubule depolymerization;GO:0050821//protein stabilization;GO:0016049//cell growth;GO:0007067//mitotic nuclear division	K16578//CLIP-associating protein 1/2	gi|747072383|ref|XP_011083101.1|//PREDICTED: CLIP-associated protein isoform X1 [Sesamum indicum];gi|747072385|ref|XP_011083102.1|//PREDICTED: CLIP-associated protein isoform X2 [Sesamum indicum]
	lcl|KV013071.1_mrna_34821	F511_08976	KZV24015.1	KV013071.1	202032	209196	sucrose nonfermenting 4-like protein	NA	NA	NA	K07200//5'-AMP-activated protein kinase, regulatory gamma subunit	gi|747086837|ref|XP_011090936.1|//PREDICTED: sucrose nonfermenting 4-like protein [Sesamum indicum]
	lcl|KV000866.1_mrna_18891	F511_11320	KZV39940.1	KV000866.1	84143	93992	long chain acyl-CoA synthetase 6%2C peroxisomal-like	NA	GO:0015645//fatty acid ligase activity	NA	K01897//long-chain acyl-CoA synthetase [EC:6.2.1.3]	gi|747088844|ref|XP_011092034.1|//PREDICTED: long chain acyl-CoA synthetase 6, peroxisomal-like [Sesamum indicum]
	lcl|KV014876.1_mrna_37016	F511_13626	KZV21823.1	KV014876.1	139641	142886	methionine adenosyltransferase 2 subunit beta	NA	NA	NA	NA	gi|747090892|ref|XP_011093156.1|//PREDICTED: methionine adenosyltransferase 2 subunit beta [Sesamum indicum]
	lcl|KV015575.1_mrna_38102	F511_26578	KZV20732.1	KV015575.1	100256	101510	hypothetical protein	NA	NA	NA	NA	gi|747070686|ref|XP_011082175.1|//PREDICTED: uncharacterized protein LOC105164999 [Sesamum indicum]
	lcl|KV011783.1_mrna_32646	F511_28554	KZV26208.1	KV011783.1	190749	196878	hypothetical protein	NA	NA	NA	K16189//phytochrome-interacting factor 4;K11253//histone H3;K07953//GTP-binding protein SAR1 [EC:3.6.5.-];K12126//phytochrome-interacting factor 3	gi|747082200|ref|XP_011088410.1|//PREDICTED: transcription factor bHLH63 [Sesamum indicum]
	lcl|KQ987746.1_mrna_1912	F511_30422	KZV56930.1	KQ987746.1	65643	73089	hypothetical protein	NA	NA	NA	K11649//SWI/SNF related-matrix-associated actin-dependent regulator of chromatin subfamily C;K08955//ATP-dependent metalloprotease [EC:3.4.24.-];K04079//molecular chaperone HtpG	gi|747045356|ref|XP_011093566.1|//PREDICTED: F-box/kelch-repeat protein At3g06240-like [Sesamum indicum];gi|747045364|ref|XP_011093604.1|//PREDICTED: uncharacterized protein LOC105173510 isoform X2 [Sesamum indicum]
	lcl|KQ995669.1_mrna_12406	F511_17867	KZV46426.1	KQ995669.1	54320	55918	protein kinase PVPK-1	NA	GO:0032559//adenyl ribonucleotide binding;GO:0004672//protein kinase activity	GO:0006464//cellular protein modification process	K08286//protein-serine/threonine kinase [EC:2.7.11.-]	gi|747100630|ref|XP_011098415.1|//PREDICTED: protein kinase PVPK-1 [Sesamum indicum]
	lcl|KV010721.1_mrna_31852	F511_17098	KZV26985.1	KV010721.1	79914	81647	hypothetical protein	NA	NA	NA	NA	gi|747042819|ref|XP_011080469.1|//PREDICTED: uncharacterized protein At5g01610-like [Sesamum indicum]
	lcl|KQ987754.1_mrna_1946	F511_15803	KZV56884.1	KQ987754.1	73864	74611	protein LURP-one-related 5	NA	NA	NA	K03239//translation initiation factor eIF-2B subunit alpha	gi|747054439|ref|XP_011073427.1|//PREDICTED: protein LURP-one-related 5-like [Sesamum indicum]
	lcl|KQ989519.1_mrna_4303	F511_01350	KZV54552.1	KQ989519.1	417171	420501	putative carbohydrate esterase	NA	NA	NA	NA	gi|976922131|gb|KVI06710.1|//putative protein of unknown function DUF303, acetylesterase [Cynara cardunculus var. scolymus];gi|747047479|ref|XP_011069713.1|//PREDICTED: probable carbohydrate esterase At4g34215 [Sesamum indicum]
	lcl|KQ992321.1_mrna_7960	F511_10499	KZV50928.1	KQ992321.1	355786	358080	G-type lectin S-receptor-like serine/threonine-protein kinase	NA	NA	NA	K04733//interleukin-1 receptor-associated kinase 4 [EC:2.7.11.1];K04730//interleukin-1 receptor-associated kinase 1 [EC:2.7.11.1]	gi|747046047|ref|XP_011097374.1|//PREDICTED: G-type lectin S-receptor-like serine/threonine-protein kinase At1g34300 [Sesamum indicum]
	lcl|KQ996399.1_mrna_13493	F511_04048	KZV45310.1	KQ996399.1	87045	88364	UDP-glucuronate 4-epimerase 5	NA	NA	NA	K08679//UDP-glucuronate 4-epimerase [EC:5.1.3.6]	gi|747068714|ref|XP_011081125.1|//PREDICTED: UDP-glucuronate 4-epimerase 3 [Sesamum indicum]
	lcl|KQ999880.1_mrna_18111	F511_22923	KZV40722.1	KQ999880.1	103230	104711	chlorophyll a/b-binding family protein	GO:0031224//intrinsic component of membrane;GO:0009521//photosystem;GO:0009534//chloroplast thylakoid	GO:0043169//cation binding;GO:0046906//tetrapyrrole binding	GO:0006464//cellular protein modification process;GO:0006091//generation of precursor metabolites and energy	K08913//light-harvesting complex II chlorophyll a/b binding protein 2	gi|959993683|gb|ALR81047.1|//chlorophyll a/b-binding protein 1 [Panax ginseng]
	lcl|KV003151.1_mrna_21633	F511_04637	KZV37218.1	KV003151.1	320732	322807	hypothetical protein	NA	NA	NA	K12471//epsin	gi|747069810|ref|XP_011081713.1|//PREDICTED: uncharacterized protein LOC105164695 [Sesamum indicum]
	lcl|KV006349.1_mrna_26047	F511_23707	KZV32795.1	KV006349.1	172251	172733	miraculin	NA	NA	NA	NA	gi|747051964|ref|XP_011072079.1|//PREDICTED: miraculin [Sesamum indicum]
	lcl|KV009357.1_mrna_29127	F511_05827	KZV29733.1	KV009357.1	328275	330960	peroxisomal (S)-2-hydroxy-acid oxidase-like	GO:0009532//plastid stroma;GO:0005576//extracellular region;GO:0042579//microbody	GO:0003973//(S)-2-hydroxy-acid oxidase activity;GO:0000166//nucleotide binding;GO:0010181//FMN binding;GO:0016491//oxidoreductase activity	GO:0008152//metabolic process;GO:0055114//oxidation-reduction process	K11517//(S)-2-hydroxy-acid oxidase [EC:1.1.3.15]	gi|565363307|ref|XP_006348379.1|//PREDICTED: peroxisomal (S)-2-hydroxy-acid oxidase GLO1 [Solanum tuberosum];gi|661890610|emb|CDP06107.1|//unnamed protein product [Coffea canephora]
	lcl|KQ988427.1_mrna_2870	F511_21588	KZV55969.1	KQ988427.1	82545	83769	putative gluconokinase	NA	GO:0032559//adenyl ribonucleotide binding;GO:0016301//kinase activity	GO:0044238//primary metabolic process;GO:0006796//phosphate-containing compound metabolic process	K00851//gluconokinase [EC:2.7.1.12]	gi|747094866|ref|XP_011095289.1|//PREDICTED: probable gluconokinase isoform X2 [Sesamum indicum];gi|747094864|ref|XP_011095288.1|//PREDICTED: probable gluconokinase isoform X1 [Sesamum indicum]
	lcl|KQ997936.1_mrna_15209	F511_00248	KZV43697.1	KQ997936.1	968095	971347	hypothetical protein	NA	GO:0004674//protein serine/threonine kinase activity	NA	K08867//WNK lysine deficient protein kinase [EC:2.7.11.1]	gi|747067963|ref|XP_011080727.1|//PREDICTED: probable serine/threonine-protein kinase WNK4 isoform X1 [Sesamum indicum]
	lcl|KV005644.1_mrna_24791	F511_02788	KZV34015.1	KV005644.1	140537	141216	hypothetical protein	NA	NA	NA	NA	gi|747087418|ref|XP_011091252.1|//PREDICTED: protein PROTON GRADIENT REGULATION 5, chloroplastic [Sesamum indicum]
	lcl|KV006331.1_mrna_25621	F511_16239	KZV33205.1	KV006331.1	62461	63172	hypothetical protein	NA	NA	NA	NA	gi|747089740|ref|XP_011092522.1|//PREDICTED: uncharacterized protein LOC105172680 [Sesamum indicum]
	lcl|KV010635.1_mrna_31482	F511_02547	KZV27438.1	KV010635.1	818974	825953	sucrose-phosphate synthase	NA	GO:0035251//UDP-glucosyltransferase activity	GO:0005984//disaccharide metabolic process	K00696//sucrose-phosphate synthase [EC:2.4.1.14]	gi|747074216|ref|XP_011084090.1|//PREDICTED: probable sucrose-phosphate synthase 1 [Sesamum indicum]
	lcl|KV013947.1_mrna_35634	F511_05029	KZV23190.1	KV013947.1	269275	271387	hypothetical protein	GO:0009534//chloroplast thylakoid;GO:0009507//chloroplast	GO:0016651//oxidoreductase activity, acting on NAD(P)H;GO:0048037//cofactor binding;GO:0016655//oxidoreductase activity, acting on NAD(P)H, quinone or similar compound as acceptor	GO:0010258//NADH dehydrogenase complex (plastoquinone) assembly;GO:0008152//metabolic process;GO:0055114//oxidation-reduction process	NA	gi|747057053|ref|XP_011074811.1|//PREDICTED: NAD(P)H-quinone oxidoreductase subunit M, chloroplastic [Sesamum indicum]
	lcl|KQ999839.1_mrna_17764	F511_14013	KZV41037.1	KQ999839.1	202118	203080	pentatricopeptide repeat-containing protein-like	NA	NA	NA	K17710//pentatricopeptide repeat domain-containing protein 1	gi|747059563|ref|XP_011076168.1|//PREDICTED: pentatricopeptide repeat-containing protein At1g55630-like [Sesamum indicum]
	lcl|KQ989535.1_mrna_4504	F511_03620	KZV54365.1	KQ989535.1	498254	499902	hypothetical protein	NA	NA	NA	NA	gi|747066512|ref|XP_011079939.1|//PREDICTED: uncharacterized protein LOC105163327 isoform X1 [Sesamum indicum];gi|747066514|ref|XP_011079940.1|//PREDICTED: uncharacterized protein LOC105163327 isoform X2 [Sesamum indicum]
	lcl|KV019049.1_mrna_42346	F511_10068	KZV16456.1	KV019049.1	116483	133169	hypothetical protein	NA	NA	NA	K14405//pre-mRNA 3'-end-processing factor FIP1	gi|747064049|ref|XP_011078593.1|//PREDICTED: FIP1[V]-like protein isoform X2 [Sesamum indicum]
	lcl|KQ987269.1_mrna_1273	F511_03141	KZV57681.1	KQ987269.1	981144	983533	UV-stimulated scaffold protein A	NA	NA	NA	NA	gi|747045412|ref|XP_011093880.1|//PREDICTED: UV-stimulated scaffold protein A homolog [Sesamum indicum]
	lcl|KQ996416.1_mrna_13615	F511_18538	KZV45216.1	KQ996416.1	178103	179889	S-adenosyl-L-methionine:carboxyl methyltransferase family protein	NA	GO:0016740//transferase activity	NA	K08241//jasmonate O-methyltransferase [EC:2.1.1.141]	gi|73619518|sp|Q9FYZ9.1|BAMT_ANTMA//RecName: Full=Benzoate carboxyl methyltransferase; AltName: Full=S-adenosyl-L-methionine:benzoic acid carboxyl methyltransferase [Antirrhinum majus]
	lcl|KQ997529.1_mrna_14709	F511_26417	KZV44138.1	KQ997529.1	83412	85649	hypothetical protein	NA	NA	NA	K13457//disease resistance protein RPM1	gi|747052851|ref|XP_011072557.1|//PREDICTED: putative late blight resistance protein homolog R1B-16 [Sesamum indicum]
	lcl|KQ986820.1_mrna_647	F511_36895	KZV58186.1	KQ986820.1	25568	26221	dehydration-responsive element-binding protein 3-like	NA	NA	NA	K09286//EREBP-like factor	gi|747052567|ref|XP_011072408.1|//PREDICTED: dehydration-responsive element-binding protein 3 [Sesamum indicum]
	lcl|KQ988193.1_mrna_2345	F511_22308	KZV56500.1	KQ988193.1	129759	131107	hypothetical protein	GO:0009507//chloroplast	NA	NA	K12825//splicing factor 3A subunit 1	gi|661898419|emb|CDO98386.1|//unnamed protein product [Coffea canephora];gi|702259720|ref|XP_010032494.1|//PREDICTED: uncharacterized protein LOC104421990 [Eucalyptus grandis]
	lcl|KQ988427.1_mrna_2873	F511_21591	KZV55972.1	KQ988427.1	108921	109244	hypothetical protein	NA	NA	NA	NA	gi|747099764|ref|XP_011097942.1|//PREDICTED: uncharacterized protein LOC105176742 [Sesamum indicum]
	lcl|KQ988427.1_mrna_2879	F511_21597	KZV55978.1	KQ988427.1	133232	134606	hypothetical protein	NA	NA	NA	NA	gi|747094902|ref|XP_011095310.1|//PREDICTED: uncharacterized protein LOC105174809 [Sesamum indicum]
	lcl|KQ990519.1_mrna_5550	F511_07602	KZV53308.1	KQ990519.1	324658	329217	homogentisate solanesyltransferase%2C chloroplastic	NA	NA	NA	K12501//homogentisate solanesyltransferase [EC:2.5.1.117]	gi|747057513|ref|XP_011075060.1|//PREDICTED: homogentisate solanesyltransferase, chloroplastic [Sesamum indicum];gi|460377953|ref|XP_004234750.1|//PREDICTED: homogentisate solanesyltransferase, chloroplastic [Solanum lycopersicum]
	lcl|KQ990519.1_mrna_5551	F511_07603	KZV53309.1	KQ990519.1	329529	330554	F-box/kelch-repeat protein-like	NA	NA	NA	K10457//kelch-like protein 20;K10443//kelch-like protein 2/3	gi|747057525|ref|XP_011075067.1|//PREDICTED: F-box/kelch-repeat protein At2g44130-like [Sesamum indicum]
	lcl|KQ993812.1_mrna_10032	F511_09218	KZV48797.1	KQ993812.1	122537	123439	RING/U-box superfamily protein	NA	NA	NA	K19041//E3 ubiquitin-protein ligase RNF38/44 [EC:2.3.2.27]	gi|747043928|ref|XP_011086388.1|//PREDICTED: RING-H2 finger protein ATL52-like [Sesamum indicum]
	lcl|KQ994471.1_mrna_10626	F511_10789	KZV48203.1	KQ994471.1	87352	89244	hypothetical protein	NA	NA	NA	K12812//ATP-dependent RNA helicase UAP56/SUB2 [EC:3.6.4.13];K18081//myotubularin-related protein 1/2 [EC:3.1.3.64 3.1.3.95]	gi|747087281|ref|XP_011091176.1|//PREDICTED: uncharacterized protein LOC105171682 [Sesamum indicum]
	lcl|KQ999852.1_mrna_17901	F511_05148	KZV40903.1	KQ999852.1	194549	195793	Mitochondrial transcription termination factor family protein isoform 1	GO:0043231//intracellular membrane-bounded organelle;GO:0044444//cytoplasmic part	NA	NA	K15032//mTERF domain-containing protein, mitochondrial	gi|747057261|ref|XP_011074926.1|//PREDICTED: uncharacterized protein LOC105159529 [Sesamum indicum]
	lcl|KV000909.1_mrna_19206	F511_33007	KZV39631.1	KV000909.1	22544	23878	flavanone 7-O-glucoside 2''-O-beta-L-rhamnosyltransferase	NA	NA	NA	K13080//flavanone 7-O-glucoside 2''-O-beta-L-rhamnosyltransferase [EC:2.4.1.236];K12937//cyanidin-3-O-glucoside 2''-O-glucuronosyltransferase [EC:2.4.1.254]	gi|661889378|emb|CDP06965.1|//unnamed protein product [Coffea canephora]
	lcl|KV001733.1_mrna_20052	F511_27132	KZV38779.1	KV001733.1	96072	98629	mitochondrial phosphate carrier protein 3%2C mitochondrial	GO:0016021//integral component of membrane	NA	GO:0006810//transport	K15102//solute carrier family 25 (mitochondrial phosphate transporter), member 3	gi|743904841|ref|XP_011045804.1|//PREDICTED: mitochondrial phosphate carrier protein 3, mitochondrial-like [Populus euphratica];gi|255543593|ref|XP_002512859.1|//PREDICTED: mitochondrial phosphate carrier protein 3, mitochondrial [Ricinus communis]
	lcl|KV002465.1_mrna_20868	F511_28039	KZV37971.1	KV002465.1	87272	88951	proline dehydrogenase 2%2C mitochondrial	NA	GO:0004657//proline dehydrogenase activity	GO:0009064//glutamine family amino acid metabolic process;GO:0006562//proline catabolic process;GO:0055114//oxidation-reduction process	K00318//proline dehydrogenase [EC:1.5.-.-]	gi|747101890|ref|XP_011099089.1|//PREDICTED: proline dehydrogenase 2, mitochondrial [Sesamum indicum]
	lcl|KV003144.1_mrna_21506	F511_01275	KZV37407.1	KV003144.1	686498	691296	Proline iminopeptidase	GO:0005829//cytosol;GO:0005773//vacuole	GO:0004177//aminopeptidase activity	GO:0006508//proteolysis	NA	gi|747045237|ref|XP_011093018.1|//PREDICTED: uncharacterized protein LOC105173066 [Sesamum indicum]
	lcl|KV003147.1_mrna_21561	F511_14671	KZV37267.1	KV003147.1	135877	139050	syntaxin-like protein	GO:0044464//cell part	GO:0005515//protein binding	GO:0015031//protein transport	K08488//syntaxin 7	gi|970047700|ref|XP_015085383.1|//PREDICTED: syntaxin-22-like [Solanum pennellii]
	lcl|KV006334.1_mrna_25748	F511_03323	KZV33057.1	KV006334.1	333825	335138	eukaryotic peptide chain release factor subunit 1-3-like	GO:0044424//intracellular part;GO:0005737//cytoplasm	GO:0016149//translation release factor activity, codon specific;GO:0003747//translation release factor activity	GO:0006415//translational termination;GO:0006412//translation	K03265//peptide chain release factor subunit 1	gi|947090241|gb|KRH38906.1|//hypothetical protein GLYMA_09G166000 [Glycine max]
	lcl|KV006883.1_mrna_26476	F511_03691	KZV32408.1	KV006883.1	400688	404781	hypothetical protein	GO:0016020//membrane;GO:0016021//integral component of membrane	NA	NA	K16302//metal transporter CNNM	gi|747066280|ref|XP_011079819.1|//PREDICTED: LOW QUALITY PROTEIN: DUF21 domain-containing protein At4g14240 [Sesamum indicum];gi|743937264|ref|XP_011013036.1|//PREDICTED: DUF21 domain-containing protein At4g14240-like isoform X1 [Populus euphratica];gi|743937266|ref|XP_011013037.1|//PREDICTED: DUF21 domain-containing protein At4g14240-like isoform X2 [Populus euphratica]
	lcl|KV007465.1_mrna_27326	F511_07397	KZV31546.1	KV007465.1	483515	506779	lysine-specific demethylase 5B-like	NA	NA	NA	K11446//histone demethylase JARID1 [EC:1.14.11.-]	gi|747041350|ref|XP_011072586.1|//PREDICTED: LOW QUALITY PROTEIN: lysine-specific demethylase 5B [Sesamum indicum]
	lcl|KV008815.1_mrna_28927	F511_17318	KZV29894.1	KV008815.1	118016	120200	hypothetical protein	NA	NA	NA	K07297//adiponectin receptor	gi|661894174|emb|CDP02615.1|//unnamed protein product [Coffea canephora]
	lcl|KV010144.1_mrna_30464	F511_16743	KZV28375.1	KV010144.1	107152	112388	putative phosphoribosylformylglycinamidine synthase%2C chloroplastic/mitochondrial-like	NA	GO:0004642//phosphoribosylformylglycinamidine synthase activity;GO:0016884//carbon-nitrogen ligase activity, with glutamine as amido-N-donor	GO:0006188//IMP biosynthetic process;GO:0006189//'de novo' IMP biosynthetic process	K01952//phosphoribosylformylglycinamidine synthase [EC:6.3.5.3]	gi|747075972|ref|XP_011085040.1|//PREDICTED: probable phosphoribosylformylglycinamidine synthase, chloroplastic/mitochondrial [Sesamum indicum]
	lcl|KV011785.1_mrna_32668	F511_06323	KZV26156.1	KV011785.1	98264	102643	hypothetical protein	NA	NA	NA	K11323//histone arginine demethylase JMJD6 [EC:1.14.11.-];K18422//helicase MOV-10 [EC:3.6.4.13]	gi|747061799|ref|XP_011077381.1|//PREDICTED: endochitinase A [Sesamum indicum]
	lcl|KV011788.1_mrna_32714	F511_06002	KZV26076.1	KV011788.1	17965	20177	hypothetical protein	NA	NA	GO:0050794//regulation of cellular process;GO:0006351//transcription, DNA-templated	K14484//auxin-responsive protein IAA	gi|747052535|ref|XP_011072390.1|//PREDICTED: auxin-responsive protein IAA27 [Sesamum indicum]
	lcl|KV011790.1_mrna_32789	F511_13930	KZV26052.1	KV011790.1	191974	193494	hypothetical protein	NA	NA	NA	K13692//UDP-glucose:(indol-3-yl)acetate beta-D-glucosyltransferase [EC:2.4.1.121];K13691//pathogen-inducible salicylic acid glucosyltransferase [EC:2.4.1.-]	gi|747093616|ref|XP_011094622.1|//PREDICTED: UDP-glycosyltransferase 86A1-like [Sesamum indicum]
	lcl|KV015601.1_mrna_38236	F511_21876	KZV20603.1	KV015601.1	104938	107235	hypothetical protein	NA	NA	NA	NA	gi|470125151|ref|XP_004298569.1|//PREDICTED: proline-rich receptor-like protein kinase PERK12 [Fragaria vesca subsp. vesca]
	lcl|KV018098.1_mrna_41101	F511_01619	KZV17810.1	KV018098.1	854236	856104	hypothetical protein	NA	NA	NA	K00276//primary-amine oxidase [EC:1.4.3.21]	gi|747050155|ref|XP_011071140.1|//PREDICTED: uncharacterized protein LOC105156641 [Sesamum indicum]
	lcl|KV018098.1_mrna_41120	F511_01638	KZV17829.1	KV018098.1	975765	980852	acylamino-acid-releasing enzyme-like	NA	GO:0004252//serine-type endopeptidase activity;GO:0070011//peptidase activity, acting on L-amino acid peptides	GO:0006508//proteolysis	K01303//acylaminoacyl-peptidase [EC:3.4.19.1]	gi|747087127|ref|XP_011091094.1|//PREDICTED: acylamino-acid-releasing enzyme-like [Sesamum indicum]
	lcl|KQ987226.1_mrna_906	F511_12512	KZV57906.1	KQ987226.1	56339	58046	hypothetical protein	NA	NA	NA	K08900//mitochondrial chaperone BCS1	gi|747053939|ref|XP_011073153.1|//PREDICTED: uncharacterized protein LOC105158192 [Sesamum indicum]
	lcl|KQ988202.1_mrna_2426	F511_00286	KZV56289.1	KQ988202.1	159626	160547	hypothetical protein	GO:0016021//integral component of membrane	NA	NA	K17279//receptor expression-enhancing protein 5/6	gi|747072088|ref|XP_011082942.1|//PREDICTED: HVA22-like protein f [Sesamum indicum]
	lcl|KQ988415.1_mrna_2767	F511_06086	KZV56069.1	KQ988415.1	205535	206134	late embryogenesis abundant protein 76-like	NA	NA	NA	K20254//perilipin-4;K01835//phosphoglucomutase [EC:5.4.2.2];K14325//RNA-binding protein with serine-rich domain 1;K13171//serine/arginine repetitive matrix protein 1;K01183//chitinase [EC:3.2.1.14]	gi|685311280|ref|XP_009146210.1|//PREDICTED: late embryogenesis abundant protein 76-like [Brassica rapa];gi|152940805|gb|ABS44867.1|//putative group 3 LEA protein [Oryza sativa Japonica Group];gi|399163416|gb|AFP33238.1|//late embryogenesis abundant protein 3 [Sorghum halepense]
	lcl|KQ989004.1_mrna_3699	F511_31465	KZV55140.1	KQ989004.1	22185	24688	putative sodium-coupled neutral amino acid transporter 6	GO:0016020//membrane	NA	NA	K14207//solute carrier family 38 (sodium-coupled neutral amino acid transporter), member 2	gi|747049673|ref|XP_011070890.1|//PREDICTED: probable sodium-coupled neutral amino acid transporter 6 [Sesamum indicum]
	lcl|KQ995380.1_mrna_12066	F511_15346	KZV46786.1	KQ995380.1	418289	421357	hypothetical protein	NA	NA	NA	NA	gi|747087594|ref|XP_011091346.1|//PREDICTED: uncharacterized protein LOC105171809 [Sesamum indicum]
	lcl|KQ995736.1_mrna_12869	F511_10671	KZV45981.1	KQ995736.1	222245	225398	methylthioribose kinase	NA	GO:0016301//kinase activity	GO:0000097//sulfur amino acid biosynthetic process;GO:0006796//phosphate-containing compound metabolic process	K00899//5-methylthioribose kinase [EC:2.7.1.100]	gi|747089757|ref|XP_011092530.1|//PREDICTED: methylthioribose kinase [Sesamum indicum]
	lcl|KQ996996.1_mrna_14364	F511_38777	KZV44475.1	KQ996996.1	15200	15662	hypothetical protein	GO:0016020//membrane;GO:0016021//integral component of membrane	GO:0051119//sugar transmembrane transporter activity	GO:0006810//transport;GO:0034219//carbohydrate transmembrane transport	K15382//solute carrier family 50 (sugar transporter)	gi|661879078|emb|CDP17203.1|//unnamed protein product [Coffea canephora]
	lcl|KQ997540.1_mrna_14756	F511_10754	KZV44083.1	KQ997540.1	221539	226343	sphingosine-1-phosphate lyase	NA	GO:0016831//carboxy-lyase activity;GO:0016832//aldehyde-lyase activity;GO:0048037//cofactor binding;GO:0030170//pyridoxal phosphate binding	GO:0019752//carboxylic acid metabolic process;GO:0043436//oxoacid metabolic process	K01634//sphinganine-1-phosphate aldolase [EC:4.1.2.27]	gi|747079271|ref|XP_011086829.1|//PREDICTED: sphingosine-1-phosphate lyase [Sesamum indicum]
	lcl|KV000899.1_mrna_19124	F511_14187	KZV39720.1	KV000899.1	90893	91288	hypothetical protein	NA	NA	NA	NA	gi|747073258|ref|XP_011083589.1|//PREDICTED: uncharacterized protein LOC105166067 [Sesamum indicum]
	lcl|KV002492.1_mrna_21064	F511_31540	KZV37772.1	KV002492.1	33789	35718	hypothetical protein	NA	GO:0003824//catalytic activity	NA	K14497//protein phosphatase 2C [EC:3.1.3.16]	gi|747067906|ref|XP_011080695.1|//PREDICTED: probable protein phosphatase 2C 24 [Sesamum indicum]
	lcl|KV007458.1_mrna_27104	F511_00478	KZV31674.1	KV007458.1	344318	344812	SGS domain-containing protein isoform 1	NA	NA	NA	K04507//calcyclin binding protein	gi|747097213|ref|XP_011096561.1|//PREDICTED: calcyclin-binding protein-like [Sesamum indicum]
	lcl|KV010160.1_mrna_30628	F511_20875	KZV28209.1	KV010160.1	159223	160659	protein kinase PVPK-1-like	NA	NA	NA	K08286//protein-serine/threonine kinase [EC:2.7.11.-]	gi|747071871|ref|XP_011082827.1|//PREDICTED: serine/threonine-protein kinase WAG1 [Sesamum indicum]
	lcl|KV010635.1_mrna_31474	F511_02539	KZV27430.1	KV010635.1	725285	735261	hypothetical protein	NA	GO:0005524//ATP binding	NA	K03593//ATP-binding protein involved in chromosome partitioning	gi|747063608|ref|XP_011078358.1|//PREDICTED: fe-S cluster assembly factor HCF101, chloroplastic [Sesamum indicum]
	lcl|KV017184.1_mrna_39962	F511_31721	KZV18882.1	KV017184.1	206750	208495	xenotropic and polytropic murine leukemia virus receptor ids-4	NA	GO:0004871//signal transducer activity	NA	K14430//phosphate transporter	gi|747063534|ref|XP_011078317.1|//PREDICTED: SPX domain-containing protein 1-like [Sesamum indicum]
	lcl|KQ997936.1_mrna_15188	F511_00227	KZV43676.1	KQ997936.1	847380	849103	hypothetical protein	GO:0009523//photosystem II	GO:0046872//metal ion binding	GO:0044237//cellular metabolic process	K02717//photosystem II oxygen-evolving enhancer protein 2	gi|661873450|emb|CDP20928.1|//unnamed protein product [Coffea canephora]
	lcl|KQ988202.1_mrna_2493	F511_00353	KZV56356.1	KQ988202.1	629236	631335	cleavage and polyadenylation specificity factor subunit 6	NA	NA	NA	K14398//cleavage and polyadenylation specificity factor subunit 6/7	gi|747095829|ref|XP_011095808.1|//PREDICTED: LOW QUALITY PROTEIN: cleavage and polyadenylation specificity factor subunit 6 [Sesamum indicum]
	lcl|KV007458.1_mrna_27071	F511_00445	KZV31641.1	KV007458.1	152576	158435	hypothetical protein	NA	NA	NA	K11267//sister chromatid cohesion protein PDS5;K08737//DNA mismatch repair protein MSH6	gi|747040574|ref|XP_011088123.1|//PREDICTED: uncharacterized protein LOC105169395 [Sesamum indicum]
	lcl|KV007458.1_mrna_27170	F511_00544	KZV31740.1	KV007458.1	737375	740904	hypothetical protein	NA	NA	NA	K04730//interleukin-1 receptor-associated kinase 1 [EC:2.7.11.1]	gi|747089910|ref|XP_011092613.1|//PREDICTED: uncharacterized protein LOC105172744 [Sesamum indicum]
	lcl|KV016225.1_mrna_38618	F511_00966	KZV20109.1	KV016225.1	156043	159884	hippocampus abundant transcript-like protein 1-like	NA	NA	NA	NA	gi|747072957|ref|XP_011083420.1|//PREDICTED: hippocampus abundant transcript 1 protein-like [Sesamum indicum]
	lcl|KV016225.1_mrna_38722	F511_01070	KZV20213.1	KV016225.1	781329	783383	hypothetical protein	GO:0030529//intracellular ribonucleoprotein complex;GO:0009536//plastid	GO:0003723//RNA binding;GO:0005198//structural molecule activity	GO:0010467//gene expression	K02996//small subunit ribosomal protein S9	gi|747073585|ref|XP_011083756.1|//PREDICTED: 30S ribosomal protein S9, chloroplastic [Sesamum indicum]
	lcl|KQ986804.1_mrna_545	F511_01120	KZV58269.1	KQ986804.1	178620	182086	hypothetical protein	NA	GO:0010181//FMN binding;GO:0016491//oxidoreductase activity	GO:0055114//oxidation-reduction process	K11517//(S)-2-hydroxy-acid oxidase [EC:1.1.3.15]	gi|565381192|ref|XP_006356963.1|//PREDICTED: peroxisomal (S)-2-hydroxy-acid oxidase GLO1-like [Solanum tuberosum];gi|823220690|ref|XP_012443046.1|//PREDICTED: peroxisomal (S)-2-hydroxy-acid oxidase isoform X2 [Gossypium raimondii];gi|697149407|ref|XP_009628914.1|//PREDICTED: peroxisomal (S)-2-hydroxy-acid oxidase GLO1-like [Nicotiana tomentosiformis]
	lcl|KV012487.1_mrna_33891	F511_01992	KZV25022.1	KV012487.1	560945	563184	hypothetical protein	GO:0031224//intrinsic component of membrane	NA	GO:0006810//transport	K09874//aquaporin NIP	gi|747101032|ref|XP_011098628.1|//PREDICTED: aquaporin NIP2-1-like [Sesamum indicum]
	lcl|KV013932.1_mrna_35555	F511_02243	KZV23342.1	KV013932.1	474547	477648	hypothetical protein	NA	NA	NA	NA	gi|747051047|ref|XP_011071607.1|//PREDICTED: uncharacterized protein LOC105157015 isoform X1 [Sesamum indicum]
	lcl|KQ996030.1_mrna_13166	F511_02264	KZV45604.1	KQ996030.1	72062	74815	protein NSP-INTERACTING KINASE 1-like	NA	NA	NA	K13418//somatic embryogenesis receptor kinase 1 [EC:2.7.10.1 2.7.11.1]	gi|747101876|ref|XP_011099082.1|//PREDICTED: protein NSP-INTERACTING KINASE 1-like isoform X2 [Sesamum indicum]
	lcl|KV014357.1_mrna_36246	F511_02624	KZV22607.1	KV014357.1	289218	291956	putative receptor-like protein kinase	NA	GO:0000166//nucleotide binding;GO:0004672//protein kinase activity	NA	K04733//interleukin-1 receptor-associated kinase 4 [EC:2.7.11.1];K04730//interleukin-1 receptor-associated kinase 1 [EC:2.7.11.1]	gi|976911412|gb|KVH98063.1|//Concanavalin A-like lectin/glucanase, subgroup [Cynara cardunculus var. scolymus];gi|747054317|ref|XP_011073359.1|//PREDICTED: probable receptor-like protein kinase At1g80640 isoform X1 [Sesamum indicum]
	lcl|KV014357.1_mrna_36252	F511_02630	KZV22613.1	KV014357.1	333547	352948	serine--tRNA ligase%2C mitochondrial	NA	NA	NA	K01875//seryl-tRNA synthetase [EC:6.1.1.11];K11267//sister chromatid cohesion protein PDS5	gi|747054261|ref|XP_011073330.1|//PREDICTED: uncharacterized protein LOC105158314 [Sesamum indicum];gi|747043143|ref|XP_011082285.1|//PREDICTED: serine--tRNA ligase, mitochondrial isoform X1 [Sesamum indicum];gi|743772695|ref|XP_010916663.1|//PREDICTED: serine--tRNA ligase, mitochondrial isoform X2 [Elaeis guineensis]
	lcl|KV005644.1_mrna_24792	F511_02789	KZV34016.1	KV005644.1	141980	142765	hypothetical protein	NA	NA	NA	NA	gi|747087420|ref|XP_011091253.1|//PREDICTED: uncharacterized protein LOC105171743 [Sesamum indicum]
	lcl|KQ987269.1_mrna_1302	F511_03170	KZV57710.1	KQ987269.1	1164292	1166847	peptidyl-prolyl cis-trans isomerase%2C chloroplastic-like	NA	GO:0016859//cis-trans isomerase activity	GO:0044267//cellular protein metabolic process	NA	gi|747100776|ref|XP_011098490.1|//PREDICTED: peptidyl-prolyl cis-trans isomerase CYP38, chloroplastic isoform X2 [Sesamum indicum]
	lcl|KV006334.1_mrna_25717	F511_03292	KZV33026.1	KV006334.1	43781	48191	hypothetical protein	NA	NA	NA	K14492//two-component response regulator ARR-A family	gi|747057109|ref|XP_011074842.1|//PREDICTED: two-component response regulator ARR16-like [Sesamum indicum]
	lcl|KV007509.1_mrna_27472	F511_05494	KZV31390.1	KV007509.1	359899	360483	MLP-like protein 34-like	NA	NA	NA	NA	gi|295844360|gb|ADG43176.1|//putative major latex-like protein [Salvia miltiorrhiza]
	lcl|KV007509.1_mrna_27473	F511_05495	KZV31391.1	KV007509.1	364580	374315	protein ACCUMULATION AND REPLICATION OF CHLOROPLASTS 3	NA	NA	NA	K03531//cell division protein FtsZ;K00889//1-phosphatidylinositol-4-phosphate 5-kinase [EC:2.7.1.68]	gi|747048967|ref|XP_011070512.1|//PREDICTED: protein ACCUMULATION AND REPLICATION OF CHLOROPLASTS 3 [Sesamum indicum];gi|697112645|ref|XP_009610201.1|//PREDICTED: protein ACCUMULATION AND REPLICATION OF CHLOROPLASTS 3 isoform X1 [Nicotiana tomentosiformis]
	lcl|KV014852.1_mrna_36922	F511_05558	KZV21868.1	KV014852.1	10751	14076	histidine protein methyltransferase 1	NA	NA	NA	NA	gi|661873881|emb|CDP20792.1|//unnamed protein product [Coffea canephora];gi|747055094|ref|XP_011073784.1|//PREDICTED: histidine protein methyltransferase 1 homolog [Sesamum indicum]
	lcl|KV014852.1_mrna_36971	F511_05607	KZV21917.1	KV014852.1	352581	354790	hypothetical protein	NA	GO:0005506//iron ion binding;GO:0016491//oxidoreductase activity	NA	K00517	gi|747045596|ref|XP_011094898.1|//PREDICTED: cytochrome P450 78A3-like [Sesamum indicum]
	lcl|KQ987720.1_mrna_1767	F511_05983	KZV57109.1	KQ987720.1	444468	446361	hypothetical protein	NA	NA	NA	NA	gi|747045769|ref|XP_011095893.1|//PREDICTED: uncharacterized protein LOC105175222 [Sesamum indicum]
	lcl|KQ987720.1_mrna_1779	F511_05995	KZV57121.1	KQ987720.1	579049	580464	hypothetical protein	GO:0009536//plastid	NA	GO:0006091//generation of precursor metabolites and energy	K08916//light-harvesting complex II chlorophyll a/b binding protein 5	gi|823226989|ref|XP_012446331.1|//PREDICTED: chlorophyll a-b binding protein CP26, chloroplastic [Gossypium raimondii]
	lcl|KQ995351.1_mrna_11911	F511_06165	KZV46923.1	KQ995351.1	211819	213315	pentatricopeptide repeat-containing protein-like	NA	NA	NA	K17964//leucine-rich PPR motif-containing protein, mitochondrial	gi|747059563|ref|XP_011076168.1|//PREDICTED: pentatricopeptide repeat-containing protein At1g55630-like [Sesamum indicum]
	lcl|KV011136.1_mrna_32031	F511_06656	KZV26809.1	KV011136.1	197149	198270	pentatricopeptide repeat-containing protein	NA	NA	NA	K17609//nucleoredoxin [EC:1.8.1.8];K17710//pentatricopeptide repeat domain-containing protein 1	gi|747092546|ref|XP_011094045.1|//PREDICTED: pentatricopeptide repeat-containing protein At3g42630-like isoform X2 [Sesamum indicum]
	lcl|KQ995675.1_mrna_12481	F511_07909	KZV46357.1	KQ995675.1	132866	133309	hypothetical protein	NA	NA	NA	K16285//RING/U-box domain-containing protein [EC:2.3.2.27]	gi|460396051|ref|XP_004243593.1|//PREDICTED: probable E3 ubiquitin-protein ligase XERICO isoform X1 [Solanum lycopersicum];gi|970037923|ref|XP_015080297.1|//PREDICTED: probable E3 ubiquitin-protein ligase XERICO [Solanum pennellii]
	lcl|KQ987736.1_mrna_1810	F511_08153	KZV56995.1	KQ987736.1	32863	35957	multidrug resistance pump	GO:0005774//vacuolar membrane;GO:0031090//organelle membrane;GO:0016021//integral component of membrane	GO:0015291//secondary active transmembrane transporter activity;GO:0015238//drug transmembrane transporter activity;GO:0015297//antiporter activity	GO:0015893//drug transport;GO:0003006//developmental process involved in reproduction;GO:0006855//drug transmembrane transport	K03327//multidrug resistance protein, MATE family	gi|747073583|ref|XP_011083755.1|//PREDICTED: protein TRANSPARENT TESTA 12 [Sesamum indicum]
	lcl|KV014884.1_mrna_37361	F511_08289	KZV21524.1	KV014884.1	612475	613629	hypothetical protein	GO:0005840//ribosome;GO:0030529//intracellular ribonucleoprotein complex	GO:0005198//structural molecule activity;GO:0003735//structural constituent of ribosome	GO:0010467//gene expression;GO:0006412//translation	K02881//large subunit ribosomal protein L18	gi|747058345|ref|XP_011075511.1|//PREDICTED: 50S ribosomal protein L18, chloroplastic [Sesamum indicum]
	lcl|KQ993852.1_mrna_10333	F511_08420	KZV48521.1	KQ993852.1	443553	446686	hypothetical protein	NA	NA	NA	K13457//disease resistance protein RPM1	gi|747049546|ref|XP_011070823.1|//PREDICTED: putative late blight resistance protein homolog R1B-17 [Sesamum indicum]
	lcl|KV017149.1_mrna_39799	F511_08455	KZV19027.1	KV017149.1	151704	153414	tubby-like F-box protein 5	NA	GO:0003824//catalytic activity	NA	K19600//tubby-related protein 1	gi|747102907|ref|XP_011099633.1|//PREDICTED: tubby-like F-box protein 5 [Sesamum indicum]
	lcl|KQ991552.1_mrna_6876	F511_08569	KZV51959.1	KQ991552.1	185925	186732	late embryogenesis abundant protein 76-like	NA	NA	NA	K20254//perilipin-4	gi|747096772|ref|XP_011096321.1|//PREDICTED: uncharacterized protein ECU03_1610 isoform X1 [Sesamum indicum]
	lcl|KV004986.1_mrna_23635	F511_08989	KZV35177.1	KV004986.1	54051	56253	Regulatory components of ABA receptor 3	NA	NA	NA	K14496//abscisic acid receptor PYR/PYL family	gi|747105513|ref|XP_011101032.1|//PREDICTED: abscisic acid receptor PYL8-like [Sesamum indicum]
	lcl|KV004986.1_mrna_23636	F511_08990	KZV35178.1	KV004986.1	58761	59678	hypothetical protein	NA	NA	NA	K09286//EREBP-like factor	gi|747105519|ref|XP_011101035.1|//PREDICTED: LOW QUALITY PROTEIN: ethylene-responsive transcription factor ERF061 [Sesamum indicum]
	lcl|KV019049.1_mrna_42374	F511_10096	KZV16484.1	KV019049.1	423706	468173	hypothetical protein	NA	NA	NA	K19525//vacuolar protein sorting-associated protein 13A/C	gi|747048521|ref|XP_011070276.1|//PREDICTED: LOW QUALITY PROTEIN: uncharacterized protein LOC105155975 [Sesamum indicum];gi|731381289|ref|XP_010664169.1|//PREDICTED: uncharacterized protein LOC100260794 [Vitis vinifera]
	lcl|KQ993830.1_mrna_10173	F511_10328	KZV48642.1	KQ993830.1	73278	77140	heat shock protein	NA	GO:0005515//protein binding;GO:0032559//adenyl ribonucleotide binding;GO:0016628//oxidoreductase activity, acting on the CH-CH group of donors, NAD or NADP as acceptor	GO:0044267//cellular protein metabolic process;GO:0050896//response to stimulus	K03283//heat shock 70kDa protein 1/8	gi|747089332|ref|XP_011092298.1|//PREDICTED: stromal 70 kDa heat shock-related protein, chloroplastic [Sesamum indicum]
	lcl|KQ995661.1_mrna_12377	F511_10635	KZV46530.1	KQ995661.1	494193	497147	PLASMODESMATA CALLOSE-BINDING protein 3	NA	NA	NA	K19891//glucan endo-1,3-beta-glucosidase 1/2/3 [EC:3.2.1.39]	gi|747080122|ref|XP_011087299.1|//PREDICTED: PLASMODESMATA CALLOSE-BINDING PROTEIN 3 [Sesamum indicum]
	lcl|KV000866.1_mrna_18896	F511_11325	KZV39945.1	KV000866.1	157678	160754	aspartic protein-like protein 1	NA	NA	NA	K00924	gi|747088822|ref|XP_011092022.1|//PREDICTED: aspartic proteinase-like protein 1 isoform X2 [Sesamum indicum]
	lcl|KV019044.1_mrna_42312	F511_11404	KZV16572.1	KV019044.1	341901	347621	prolyl-tRNA synthetase associated domain-containing protein 1	NA	NA	NA	K10706//senataxin [EC:3.6.4.-]	gi|747047195|ref|XP_011069556.1|//PREDICTED: prolyl-tRNA synthetase associated domain-containing protein 1 [Sesamum indicum]
	lcl|KQ996417.1_mrna_13669	F511_11805	KZV45205.1	KQ996417.1	480621	483228	Major facilitator superfamily protein	GO:0016021//integral component of membrane	GO:0005215//transporter activity	GO:0006810//transport	K14638//solute carrier family 15 (peptide/histidine transporter), member 3/4	gi|747073886|ref|XP_011083919.1|//PREDICTED: protein NRT1/ PTR FAMILY 4.5-like [Sesamum indicum]
	lcl|KV010031.1_mrna_30149	F511_12213	KZV28687.1	KV010031.1	47840	51029	putative mediator of RNA polymerase II transcription subunit 36b	NA	GO:0016741//transferase activity, transferring one-carbon groups;GO:0003676//nucleic acid binding	GO:0042254//ribosome biogenesis;GO:0006399//tRNA metabolic process;GO:0006730//one-carbon metabolic process	K14563//rRNA 2'-O-methyltransferase fibrillarin [EC:2.1.1.-]	gi|747074869|ref|XP_011084445.1|//PREDICTED: mediator of RNA polymerase II transcription subunit 36a-like [Sesamum indicum]
	lcl|KQ987226.1_mrna_924	F511_12530	KZV57924.1	KQ987226.1	155061	157870	4-coumarate--CoA ligase 2-like	NA	GO:0032559//adenyl ribonucleotide binding;GO:0016405//CoA-ligase activity	GO:0006725//cellular aromatic compound metabolic process	K01904//4-coumarate--CoA ligase [EC:6.2.1.12]	gi|219671340|gb|ACL31667.1|//4-coumarate coenzyme A ligase [Paulownia fortunei]
	lcl|KQ999284.1_mrna_16599	F511_13357	KZV42258.1	KQ999284.1	165187	168043	fructokinase 3	NA	GO:0016773//phosphotransferase activity, alcohol group as acceptor	GO:0044237//cellular metabolic process	K00847//fructokinase [EC:2.7.1.4]	gi|747102614|ref|XP_011099474.1|//PREDICTED: probable fructokinase-6, chloroplastic [Sesamum indicum]
	lcl|KV007463.1_mrna_27265	F511_13539	KZV31599.1	KV007463.1	441902	444934	putative xyloglucan endotransglucosylase/hydrolase protein 30-like	NA	NA	NA	K08235//xyloglucan:xyloglucosyl transferase [EC:2.4.1.207]	gi|747043934|ref|XP_011086421.1|//PREDICTED: probable xyloglucan endotransglucosylase/hydrolase protein 30 [Sesamum indicum]
	lcl|KV010000.1_mrna_29962	F511_13718	KZV28923.1	KV010000.1	530349	541607	hypothetical protein	NA	GO:0003989//acetyl-CoA carboxylase activity;GO:0004075//biotin carboxylase activity;GO:0046872//metal ion binding;GO:0005524//ATP binding;GO:0000166//nucleotide binding;GO:0016874//ligase activity	GO:0006633//fatty acid biosynthetic process	K11262//acetyl-CoA carboxylase / biotin carboxylase 1 [EC:6.4.1.2 6.3.4.14]	gi|727580728|ref|XP_010463174.1|//PREDICTED: acetyl-CoA carboxylase 1-like [Camelina sativa];gi|747072919|ref|XP_011083399.1|//PREDICTED: acetyl-CoA carboxylase 1-like isoform X1 [Sesamum indicum];gi|475552798|gb|EMT11869.1|//Acetyl-CoA carboxylase [Aegilops tauschii]
	lcl|KV011790.1_mrna_32799	F511_13940	KZV26062.1	KV011790.1	277769	281689	synaptotagmin-3	NA	GO:0003964//RNA-directed DNA polymerase activity;GO:0008270//zinc ion binding;GO:0004519//endonuclease activity;GO:0004190//aspartic-type endopeptidase activity;GO:0003676//nucleic acid binding	GO:0015074//DNA integration;GO:0006508//proteolysis;GO:0090305//nucleic acid phosphodiester bond hydrolysis;GO:0006278//RNA-dependent DNA replication	K12486//stromal membrane-associated protein;K03006//DNA-directed RNA polymerase II subunit RPB1 [EC:2.7.7.6];K19938//rabphilin-3A;K05658//ATP-binding cassette, subfamily B (MDR/TAP), member 1 [EC:3.6.3.44];K01652//acetolactate synthase I/II/III large subunit [EC:2.2.1.6];K03511//DNA polymerase kappa [EC:2.7.7.7]	gi|747061727|ref|XP_011077343.1|//PREDICTED: synaptotagmin-3-like isoform X2 [Sesamum indicum];gi|13540823|gb|AAK29467.1|//polyprotein-like [Solanum chilense]
	lcl|KV003914.1_mrna_22586	F511_14249	KZV36231.1	KV003914.1	216060	217521	hypothetical protein	NA	GO:0003824//catalytic activity	NA	K00799//glutathione S-transferase [EC:2.5.1.18]	gi|694361441|ref|XP_009360417.1|//PREDICTED: glutathione S-transferase U17-like [Pyrus x bretschneideri]
	lcl|KV016230.1_mrna_38808	F511_15304	KZV20061.1	KV016230.1	447309	455699	hypothetical protein	GO:0012505//endomembrane system;GO:0005622//intracellular	GO:0017137//Rab GTPase binding;GO:0005096//GTPase activator activity	GO:0006886//intracellular protein transport;GO:0090630//activation of GTPase activity;GO:0031338//regulation of vesicle fusion	K20168//TBC1 domain family member 15	gi|747074271|ref|XP_011084120.1|//PREDICTED: TBC1 domain family member 15 [Sesamum indicum]
	lcl|KV009380.1_mrna_29473	F511_15923	KZV29391.1	KV009380.1	333854	336859	eukaryotic translation initiation factor 2c	NA	GO:0003676//nucleic acid binding	GO:0098542//defense response to other organism;GO:0016032//viral process	K11593//eukaryotic translation initiation factor 2C	gi|823234883|ref|XP_012450069.1|//PREDICTED: protein argonaute 2 isoform X2 [Gossypium raimondii];gi|661878667|emb|CDP17623.1|//unnamed protein product [Coffea canephora];gi|923607929|ref|XP_013743286.1|//PREDICTED: protein argonaute 2-like [Brassica napus]
	lcl|KV014879.1_mrna_37168	F511_16359	KZV21653.1	KV014879.1	94681	98036	Tetratricopeptide repeat-like superfamily protein	NA	NA	NA	K17964//leucine-rich PPR motif-containing protein, mitochondrial	gi|747097836|ref|XP_011096896.1|//PREDICTED: pentatricopeptide repeat-containing protein At2g35130 [Sesamum indicum]
	lcl|KV014879.1_mrna_37173	F511_16364	KZV21658.1	KV014879.1	150170	151489	hypothetical protein	NA	NA	NA	NA	gi|747097611|ref|XP_011096778.1|//PREDICTED: uncharacterized protein LOC105175855 [Sesamum indicum]
	lcl|KV011796.1_mrna_32849	F511_16903	KZV25990.1	KV011796.1	62490	66905	cytosolic endo-beta-N-acetylglucosaminidase-like	NA	NA	NA	K01227//mannosyl-glycoprotein endo-beta-N-acetylglucosaminidase [EC:3.2.1.96]	gi|747060443|ref|XP_011076651.1|//PREDICTED: cytosolic endo-beta-N-acetylglucosaminidase [Sesamum indicum]
	lcl|KV011876.1_mrna_33386	F511_17220	KZV25442.1	KV011876.1	182375	184027	hypothetical protein	NA	NA	NA	K09566//peptidyl-prolyl isomerase G (cyclophilin G) [EC:5.2.1.8];K11294//nucleolin	gi|747066371|ref|XP_011079868.1|//PREDICTED: NF-kappa-B-activating protein [Sesamum indicum]
	lcl|KV012822.1_mrna_34450	F511_17570	KZV24379.1	KV012822.1	90011	91442	trans-resveratrol di-O-methyltransferase	NA	GO:0008171//O-methyltransferase activity	NA	K13262//isoflavone-7-O-methyltransferase [EC:2.1.1.150];K16040//trans-resveratrol di-O-methyltransferase [EC:2.1.1.240];K13259//2,7,4'-trihydroxyisoflavanone 4'-O-methyltransferase / isoflavone 4'-O-methyltransferase [EC:2.1.1.212 2.1.1.46]	gi|225446489|ref|XP_002278190.1|//PREDICTED: trans-resveratrol di-O-methyltransferase [Vitis vinifera]
	lcl|KV017181.1_mrna_39919	F511_17825	KZV18919.1	KV017181.1	158180	172299	hypothetical protein	NA	NA	NA	K15115//solute carrier family 25 (mitochondrial folate transporter), member 32;K05909//laccase [EC:1.10.3.2];K03021//DNA-directed RNA polymerase III subunit RPC2 [EC:2.7.7.6];K00620//glutamate N-acetyltransferase / amino-acid N-acetyltransferase [EC:2.3.1.35 2.3.1.1];K18195//rhamnogalacturonan endolyase [EC:4.2.2.23];K15813//beta-amyrin synthase [EC:5.4.99.39];K15601//lysine-specific demethylase …	gi|747044309|ref|XP_011088368.1|//PREDICTED: CSC1-like protein At3g54510 isoform X4 [Sesamum indicum];gi|747044305|ref|XP_011088351.1|//PREDICTED: CSC1-like protein At3g54510 isoform X2 [Sesamum indicum];gi|590645329|ref|XP_007031312.1|//Uncharacterized protein TCM_016762 [Theobroma cacao]
	lcl|KV018443.1_mrna_41541	F511_18245	KZV17304.1	KV018443.1	198589	200018	Nucleotide binding protein 35	NA	NA	NA	K03593//ATP-binding protein involved in chromosome partitioning	gi|747101395|ref|XP_011098827.1|//PREDICTED: cytosolic Fe-S cluster assembly factor NBP35-like [Sesamum indicum]
	lcl|KV011845.1_mrna_33198	F511_18927	KZV25643.1	KV011845.1	118846	119274	hypothetical protein	NA	NA	NA	NA	gi|747051728|ref|XP_011071954.1|//PREDICTED: uncharacterized protein LOC105157280 [Sesamum indicum]
	lcl|KV008727.1_mrna_28713	F511_19644	KZV30101.1	KV008727.1	16968	22156	hypothetical protein	NA	GO:0003714//transcription corepressor activity	GO:0006351//transcription, DNA-templated;GO:1903507//negative regulation of nucleic acid-templated transcription	NA	gi|747103668|ref|XP_011100033.1|//PREDICTED: protein SCAI [Sesamum indicum]
	lcl|KQ998120.1_mrna_15442	F511_21980	KZV43388.1	KQ998120.1	165621	166601	hypothetical protein	NA	NA	NA	K03006//DNA-directed RNA polymerase II subunit RPB1 [EC:2.7.7.6];K16570//gamma-tubulin complex component 3;K08176//MFS transporter, PHS family, inorganic phosphate transporter;K01209//alpha-N-arabinofuranosidase [EC:3.2.1.55];K05658//ATP-binding cassette, subfamily B (MDR/TAP), member 1 [EC:3.6.3.44]	gi|377655441|gb|AFB73911.1|//polyprotein [Citrus sinensis]
	lcl|KQ999325.1_mrna_16897	F511_22051	KZV41936.1	KQ999325.1	10556	14394	inactive leucine-rich repeat receptor-like protein kinase-like	NA	GO:0016740//transferase activity	NA	K00924;K08286//protein-serine/threonine kinase [EC:2.7.11.-];K13420//LRR receptor-like serine/threonine-protein kinase FLS2 [EC:2.7.11.1]	gi|747060319|ref|XP_011076585.1|//PREDICTED: LOW QUALITY PROTEIN: probably inactive leucine-rich repeat receptor-like protein kinase At3g28040 [Sesamum indicum]
	lcl|KQ999391.1_mrna_17088	F511_22154	KZV41742.1	KQ999391.1	58082	59642	cancer-related nucleoside-triphosphatase	NA	GO:0032559//adenyl ribonucleotide binding;GO:0016462//pyrophosphatase activity	NA	K06928//nucleoside-triphosphatase [EC:3.6.1.15]	gi|747097978|ref|XP_011096975.1|//PREDICTED: cancer-related nucleoside-triphosphatase homolog isoform X1 [Sesamum indicum]
	lcl|KQ999391.1_mrna_17098	F511_22164	KZV41752.1	KQ999391.1	119441	122716	monosaccharide-sensing protein 2-like	GO:0016020//membrane	GO:0005215//transporter activity;GO:0016491//oxidoreductase activity	GO:0006810//transport	K08150//MFS transporter, SP family, solute carrier family 2 (myo-inositol transporter), member 13	gi|747099902|ref|XP_011098017.1|//PREDICTED: monosaccharide-sensing protein 2-like [Sesamum indicum]
	lcl|KQ988193.1_mrna_2331	F511_22294	KZV56486.1	KQ988193.1	5864	8035	hypothetical protein	NA	NA	NA	K13457//disease resistance protein RPM1	gi|747052132|ref|XP_011072173.1|//PREDICTED: putative late blight resistance protein homolog R1A-10 [Sesamum indicum]
	lcl|KQ988193.1_mrna_2342	F511_22305	KZV56497.1	KQ988193.1	112483	116281	hypothetical protein	NA	NA	NA	K13457//disease resistance protein RPM1	gi|747052851|ref|XP_011072557.1|//PREDICTED: putative late blight resistance protein homolog R1B-16 [Sesamum indicum]
	lcl|KQ999390.1_mrna_17072	F511_22569	KZV41758.1	KQ999390.1	33180	36588	Ras-related protein Rab-18	GO:0005622//intracellular	GO:0032561//guanyl ribonucleotide binding;GO:0005525//GTP binding	GO:0006810//transport;GO:0007264//small GTPase mediated signal transduction;GO:0035556//intracellular signal transduction	K07910//Ras-related protein Rab-18	gi|747057012|ref|XP_011074789.1|//PREDICTED: ras-related protein RABC1 [Sesamum indicum]
	lcl|KV000901.1_mrna_19153	F511_22693	KZV39668.1	KV000901.1	109206	110346	hypothetical protein	GO:0016021//integral component of membrane	NA	NA	K09490//heat shock 70kDa protein 5	gi|747079900|ref|XP_011087179.1|//PREDICTED: uncharacterized protein LOC105168733 [Sesamum indicum]
	lcl|KV000901.1_mrna_19164	F511_22704	KZV39679.1	KV000901.1	226286	227908	U-box domain-containing protein 38-like	NA	NA	NA	K08332//vacuolar protein 8	gi|747052014|ref|XP_011072106.1|//PREDICTED: U-box domain-containing protein 38-like [Sesamum indicum]
	lcl|KQ995671.1_mrna_12427	F511_23616	KZV46410.1	KQ995671.1	48765	53714	histidine kinase 4	GO:0044464//cell part	GO:0032559//adenyl ribonucleotide binding;GO:0004871//signal transducer activity;GO:0004673//protein histidine kinase activity	GO:0007165//signal transduction;GO:0006468//protein phosphorylation;GO:0006351//transcription, DNA-templated	K14489//arabidopsis histidine kinase 2/3/4 (cytokinin receptor) [EC:2.7.13.3]	gi|747048989|ref|XP_011070524.1|//PREDICTED: histidine kinase 4 [Sesamum indicum]
	lcl|KV006349.1_mrna_26034	F511_23694	KZV32782.1	KV006349.1	80539	81516	hypothetical protein	GO:0016020//membrane	NA	GO:0006810//transport	K09873//aquaporin TIP	gi|747051994|ref|XP_011072095.1|//PREDICTED: probable aquaporin TIP3-2 [Sesamum indicum]
	lcl|KV018463.1_mrna_41740	F511_24097	KZV17079.1	KV018463.1	38421	41033	disease resistance protein	NA	NA	NA	K13459//disease resistance protein RPS2	gi|302143210|emb|CBI20505.3|//unnamed protein product [Vitis vinifera]
	lcl|KQ992983.1_mrna_9087	F511_24197	KZV49736.1	KQ992983.1	19141	25528	hypothetical protein	NA	NA	NA	K15095//(+)-neomenthol dehydrogenase [EC:1.1.1.208]	gi|747102190|ref|XP_011099250.1|//PREDICTED: BTB/POZ domain-containing protein At5g66560 [Sesamum indicum];gi|643721957|gb|KDP31836.1|//hypothetical protein JCGZ_12297 [Jatropha curcas]
	lcl|KQ992983.1_mrna_9094	F511_24204	KZV49743.1	KQ992983.1	72976	77600	hypothetical protein	NA	NA	NA	K16670//homeobox protein Meis2;K15613//homeobox protein Meis1	gi|747102224|ref|XP_011099269.1|//PREDICTED: BEL1-like homeodomain protein 4 [Sesamum indicum]
	lcl|KV010618.1_mrna_31215	F511_24692	KZV27633.1	KV010618.1	110828	111788	hypothetical protein	NA	NA	NA	NA	gi|747062274|ref|XP_011077637.1|//PREDICTED: uncharacterized protein LOC105161598 [Sesamum indicum]
	lcl|KV010154.1_mrna_30543	F511_25276	KZV28301.1	KV010154.1	101960	106986	U-box domain-containing protein 32-like	NA	NA	NA	K04733//interleukin-1 receptor-associated kinase 4 [EC:2.7.11.1];K04730//interleukin-1 receptor-associated kinase 1 [EC:2.7.11.1]	gi|747059525|ref|XP_011076149.1|//PREDICTED: U-box domain-containing protein 32 isoform X3 [Sesamum indicum];gi|747059519|ref|XP_011076145.1|//PREDICTED: U-box domain-containing protein 32 isoform X1 [Sesamum indicum]
	lcl|KV010210.1_mrna_30847	F511_25859	KZV27982.1	KV010210.1	49276	52894	serine hydroxymethyltransferase%2C mitochondrial	GO:0043231//intracellular membrane-bounded organelle	GO:0016742//hydroxymethyl-, formyl- and related transferase activity;GO:0048037//cofactor binding	GO:0006730//one-carbon metabolic process;GO:0009069//serine family amino acid metabolic process	K00600//glycine hydroxymethyltransferase [EC:2.1.2.1]	gi|747054816|ref|XP_011073635.1|//PREDICTED: serine hydroxymethyltransferase, mitochondrial [Sesamum indicum]
	lcl|KQ996029.1_mrna_13146	F511_26736	KZV45710.1	KQ996029.1	230845	233213	hypothetical protein	NA	NA	NA	K05609//ubiquitin carboxyl-terminal hydrolase L3 [EC:3.4.19.12]	gi|747051673|ref|XP_011071926.1|//PREDICTED: uncharacterized protein LOC105157258 [Sesamum indicum]
	lcl|KV000871.1_mrna_18913	F511_26923	KZV39927.1	KV000871.1	48447	49535	zinc finger protein CONSTANS-LIKE 4-like	NA	NA	NA	K12135//zinc finger protein CONSTANS	gi|747070397|ref|XP_011082019.1|//PREDICTED: zinc finger protein CONSTANS-LIKE 4-like [Sesamum indicum]
	lcl|KV003905.1_mrna_22512	F511_28769	KZV36327.1	KV003905.1	44084	50973	hypothetical protein	NA	NA	NA	K01240//uridine nucleosidase [EC:3.2.2.3]	gi|747086743|ref|XP_011090885.1|//PREDICTED: uncharacterized protein LOC105171457 isoform X2 [Sesamum indicum]
	lcl|KQ993922.1_mrna_10506	F511_29248	KZV48331.1	KQ993922.1	130403	133744	hypothetical protein	GO:0016021//integral component of membrane	GO:0005249//voltage-gated potassium channel activity	GO:0071805//potassium ion transmembrane transport	K05391//cyclic nucleotide gated channel, other eukaryote;K04908//potassium voltage-gated channel Eag-related subfamily H member 5	gi|747097197|ref|XP_011096553.1|//PREDICTED: potassium channel KAT3-like [Sesamum indicum]
	lcl|KQ996429.1_mrna_13749	F511_29404	KZV45083.1	KQ996429.1	33371	36056	hypothetical protein	NA	NA	NA	K13199//plasminogen activator inhibitor 1 RNA-binding protein	gi|747107089|ref|XP_011101848.1|//PREDICTED: plasminogen activator inhibitor 1 RNA-binding protein-like [Sesamum indicum]
	lcl|KV018453.1_mrna_41686	F511_29475	KZV17168.1	KV018453.1	197647	198607	transcription factor DIVARICATA-like	NA	NA	NA	K08869//aarF domain-containing kinase;K12133//MYB-related transcription factor LHY;K17613//calcineurin-binding protein cabin-1	gi|747094292|ref|XP_011094978.1|//PREDICTED: transcription factor DIVARICATA-like [Sesamum indicum]
	lcl|KV011915.1_mrna_33589	F511_29660	KZV25248.1	KV011915.1	56512	56817	hypothetical protein	NA	NA	NA	NA	gi|225467027|ref|XP_002265860.1|//PREDICTED: uncharacterized protein LOC100262366 [Vitis vinifera]
	lcl|KV005689.1_mrna_25100	F511_33482	KZV33740.1	KV005689.1	48778	57160	hypothetical protein	GO:0031224//intrinsic component of membrane	GO:0004871//signal transducer activity	NA	K14514//ethylene-insensitive protein 3	gi|747087480|ref|XP_011091282.1|//PREDICTED: LOW QUALITY PROTEIN: phosphate transporter PHO1 [Sesamum indicum]
	lcl|KV011852.1_mrna_33240	F511_33988	KZV25604.1	KV011852.1	209312	211494	hypothetical protein	GO:0044464//cell part	GO:0032561//guanyl ribonucleotide binding;GO:0005525//GTP binding	GO:0032506//cytokinetic process;GO:0000917//barrier septum assembly	K03978//GTP-binding protein	gi|747054891|ref|XP_011073677.1|//PREDICTED: GTP-binding protein At2g22870 [Sesamum indicum]
	lcl|KV005066.1_mrna_24423	F511_35451	KZV34414.1	KV005066.1	32674	34267	succinate dehydrogenase	NA	GO:0003824//catalytic activity;GO:0051540//metal cluster binding	GO:0009060//aerobic respiration	K00235//succinate dehydrogenase (ubiquinone) iron-sulfur subunit [EC:1.3.5.1]	gi|747098636|ref|XP_011097339.1|//PREDICTED: succinate dehydrogenase [ubiquinone] iron-sulfur subunit 2, mitochondrial-like [Sesamum indicum]
	lcl|KQ986820.1_mrna_648	F511_36896	KZV58187.1	KQ986820.1	30181	30873	hypothetical protein	NA	NA	NA	K09873//aquaporin TIP;K20131//Rab5 GDP/GTP exchange factor	gi|747042855|ref|XP_011080653.1|//PREDICTED: uncharacterized protein LOC105163853 [Sesamum indicum]
	lcl|KQ995377.1_mrna_12038	F511_37246	KZV46798.1	KQ995377.1	22581	26584	transmembrane protein 184C	GO:0016021//integral component of membrane	NA	GO:0009626//plant-type hypersensitive response	NA	gi|747063132|ref|XP_011078102.1|//PREDICTED: transmembrane protein 184 homolog DDB_G0279555 isoform X1 [Sesamum indicum]
	lcl|KQ999368.1_mrna_17016	F511_37374	KZV41824.1	KQ999368.1	21299	24222	hypothetical protein	NA	NA	NA	K19040//E3 ubiquitin-protein ligase ATL10/75/76/77/78 [EC:2.3.2.27];K19038//E3 ubiquitin-protein ligase ATL41 [EC:2.3.2.27]	gi|747060481|ref|XP_011076672.1|//PREDICTED: RING-H2 finger protein ATL66 [Sesamum indicum]
	lcl|KV012567.1_mrna_34209	F511_38069	KZV24629.1	KV012567.1	26878	27850	hypothetical protein	NA	NA	NA	K11275//histone H1/5	gi|747066632|ref|XP_011080004.1|//PREDICTED: histone H1 [Sesamum indicum]
	lcl|KV001378.1_mrna_19861	F511_41066	KZV38977.1	KV001378.1	6946	8816	hypothetical protein	NA	NA	NA	K16812//targeting protein for Xklp2;K12472//epidermal growth factor receptor substrate 15;K19942//growth arrest-specific protein 8;K11294//nucleolin	gi|747092842|ref|XP_011094204.1|//PREDICTED: uncharacterized protein LOC105173962 [Sesamum indicum]
	lcl|KV015087.1_mrna_37979	F511_41100	KZV20858.1	KV015087.1	7849	10271	hypothetical protein	NA	GO:0000166//nucleotide binding	NA	K03283//heat shock 70kDa protein 1/8	gi|920679271|gb|KOM26183.1|//hypothetical protein LR48_Vigan238s001600 [Vigna angularis]
	lcl|KV011324.1_mrna_32533	F511_41355	KZV26305.1	KV011324.1	3674	5593	putative LRR receptor-like serine/threonine-protein kinase	NA	NA	NA	K13420//LRR receptor-like serine/threonine-protein kinase FLS2 [EC:2.7.11.1]	gi|698457069|ref|XP_009780759.1|//PREDICTED: probable LRR receptor-like serine/threonine-protein kinase At3g47570 [Nicotiana sylvestris];gi|661884879|emb|CDP11411.1|//unnamed protein product [Coffea canephora]
	lcl|KQ990357.1_mrna_5365	F511_14833	KZV53467.1	KQ990357.1	241146	244111	hypothetical protein	NA	NA	NA	K10949//ER lumen protein retaining receptor	gi|747090364|ref|XP_011092867.1|//PREDICTED: putative ER lumen protein-retaining receptor C28H8.4 [Sesamum indicum]
	lcl|KQ995242.1_mrna_11178	F511_14415	KZV47629.1	KQ995242.1	52439	53783	hypothetical protein	NA	NA	NA	K04498//E1A/CREB-binding protein [EC:2.3.1.48]	gi|747069525|ref|XP_011081559.1|//PREDICTED: uncharacterized protein LOC105164576 isoform X1 [Sesamum indicum]
	lcl|KV010132.1_mrna_30405	F511_03251	KZV28448.1	KV010132.1	359178	367795	transcriptional activator DEMETER-like	NA	NA	NA	K10773//endonuclease III [EC:4.2.99.18]	gi|747093479|ref|XP_011094546.1|//PREDICTED: protein ROS1-like [Sesamum indicum];gi|743810957|ref|XP_011018881.1|//PREDICTED: protein ROS1 isoform X2 [Populus euphratica]
	lcl|KQ995736.1_mrna_12857	F511_10659	KZV45969.1	KQ995736.1	135818	140412	hypothetical protein	NA	NA	NA	K11789//HIV-1 Vpr-binding protein;K18081//myotubularin-related protein 1/2 [EC:3.1.3.64 3.1.3.95];K07735//putative transcriptional regulator	gi|747057909|ref|XP_011075278.1|//PREDICTED: uncharacterized protein LOC105159789 isoform X2 [Sesamum indicum]
	lcl|KV006402.1_mrna_26205	F511_36181	KZV32633.1	KV006402.1	18810	19154	hypothetical protein	NA	NA	NA	K04460//serine/threonine-protein phosphatase 5 [EC:3.1.3.16]	gi|645264530|ref|XP_008237721.1|//PREDICTED: uncharacterized protein LOC103336456 [Prunus mume]
	lcl|KV007509.1_mrna_27487	F511_05509	KZV31405.1	KV007509.1	560007	560455	serine/threonine-protein kinase	NA	GO:0032559//adenyl ribonucleotide binding;GO:0004672//protein kinase activity	GO:0006464//cellular protein modification process	K04733//interleukin-1 receptor-associated kinase 4 [EC:2.7.11.1]	gi|747094326|ref|XP_011094994.1|//PREDICTED: putative serine/threonine-protein kinase isoform X2 [Sesamum indicum];gi|747094324|ref|XP_011094993.1|//PREDICTED: putative serine/threonine-protein kinase isoform X1 [Sesamum indicum]
	lcl|KV008815.1_mrna_28921	F511_17312	KZV29888.1	KV008815.1	72212	72807	hypothetical protein	NA	NA	NA	NA	gi|747102374|ref|XP_011099351.1|//PREDICTED: uncharacterized protein LOC105177798 [Sesamum indicum]
	lcl|KQ988223.1_mrna_2653	F511_24001	KZV56184.1	KQ988223.1	53836	56545	receptor kinase	NA	NA	NA	K04730//interleukin-1 receptor-associated kinase 1 [EC:2.7.11.1];K13415//protein brassinosteroid insensitive 1 [EC:2.7.10.1 2.7.11.1]	gi|747106235|ref|XP_011101406.1|//PREDICTED: probable LRR receptor-like serine/threonine-protein kinase At2g24230 [Sesamum indicum]
	lcl|KQ991027.1_mrna_6193	F511_07023	KZV52630.1	KQ991027.1	182049	182681	hypothetical protein	NA	NA	NA	NA	gi|747082234|ref|XP_011088428.1|//PREDICTED: uncharacterized protein LOC105169660 [Sesamum indicum]
	lcl|KQ992521.1_mrna_8611	F511_03193	KZV50239.1	KQ992521.1	418737	419451	hypothetical protein	GO:0031224//intrinsic component of membrane	NA	NA	K19892//glucan endo-1,3-beta-glucosidase 4 [EC:3.2.1.39];K19891//glucan endo-1,3-beta-glucosidase 1/2/3 [EC:3.2.1.39]	gi|747049778|ref|XP_011070943.1|//PREDICTED: PLASMODESMATA CALLOSE-BINDING PROTEIN 3 [Sesamum indicum]
	lcl|KV000922.1_mrna_19304	F511_32711	KZV39543.1	KV000922.1	118462	120063	reticuline oxidase-like protein	NA	NA	NA	NA	gi|747097466|ref|XP_011096699.1|//PREDICTED: reticuline oxidase-like protein [Sesamum indicum]
	lcl|KV011136.1_mrna_32052	F511_06677	KZV26830.1	KV011136.1	332991	333491	hypothetical protein	NA	NA	NA	K09286//EREBP-like factor	gi|460396256|ref|XP_004243693.1|//PREDICTED: ethylene-responsive transcription factor ERF018-like [Solanum lycopersicum]
	lcl|KQ999839.1_mrna_17758	F511_14007	KZV41031.1	KQ999839.1	168734	170754	BAHD acyltransferase DCR-like	NA	GO:0016747//transferase activity, transferring acyl groups other than amino-acyl groups	NA	K19747//BAHD acyltransferase [EC:2.3.1.-]	gi|113912329|gb|ABI48361.1|//putative alcohol acyltransferase 2 [Lavandula angustifolia]
	lcl|KV000901.1_mrna_19147	F511_22687	KZV39662.1	KV000901.1	35798	37678	Homeodomain-like superfamily protein	NA	NA	NA	K03283//heat shock 70kDa protein 1/8;K08869//aarF domain-containing kinase;K17613//calcineurin-binding protein cabin-1	gi|747051369|ref|XP_011071772.1|//PREDICTED: transcription factor MYB1R1 [Sesamum indicum]
	lcl|KV007458.1_mrna_27156	F511_00530	KZV31726.1	KV007458.1	633456	636516	hypothetical protein	GO:0031224//intrinsic component of membrane;GO:0005887//integral component of plasma membrane	GO:0015293//symporter activity;GO:0015204//urea transmembrane transporter activity	GO:0030001//metal ion transport;GO:0071918//urea transmembrane transport	NA	gi|747089958|ref|XP_011092640.1|//PREDICTED: urea-proton symporter DUR3 [Sesamum indicum]
	lcl|KQ987720.1_mrna_1732	F511_05948	KZV57074.1	KQ987720.1	197864	201364	peroxidase 64	NA	GO:0003676//nucleic acid binding	GO:0009987//cellular process	K13024//inositol-hexakisphosphate/diphosphoinositol-pentakisphosphate 1-kinase [EC:2.7.4.24];K16196//eukaryotic translation initiation factor 2-alpha kinase 4 [EC:2.7.11.1];K13356//alcohol-forming fatty acyl-CoA reductase [EC:1.2.1.84];K08247//methionine S-methyltransferase [EC:2.1.1.12]	gi|920707770|gb|KOM49767.1|//hypothetical protein LR48_Vigan08g059400 [Vigna angularis]
	lcl|KQ993010.1_mrna_9285	F511_16650	KZV49560.1	KQ993010.1	354518	356215	late embryogenesis abundant protein D-29	NA	NA	NA	K20254//perilipin-4	gi|694324901|ref|XP_009353428.1|//PREDICTED: late embryogenesis abundant protein D-29 isoform X1 [Pyrus x bretschneideri];gi|971554767|ref|XP_006349872.2|//PREDICTED: late embryogenesis abundant protein D-29 [Solanum tuberosum];gi|727511737|ref|XP_010432162.1|//PREDICTED: embryonic protein DC-8 isoform X3 [Camelina sativa];gi|727547459|ref|XP_010446772.1|//PREDICTED: embryonic protein DC-8-like i…
putative methylation-regulated mid-term dehydration stress memory genes	lcl|KV011878.1_mrna_33420	F511_19808	KZV25428.1	KV011878.1	184628	186723	hypothetical protein	NA	NA	NA	K04730//interleukin-1 receptor-associated kinase 1 [EC:2.7.11.1]	gi|156616771|gb|ABU87404.1|//SMLII [Salvia miltiorrhiza]
	lcl|KQ989519.1_mrna_4295	F511_01342	KZV54544.1	KQ989519.1	354764	355580	hypothetical protein	NA	NA	NA	NA	gi|697188453|ref|XP_009603270.1|//PREDICTED: uncharacterized protein At2g23090-like [Nicotiana tomentosiformis]
	lcl|KV010635.1_mrna_31486	F511_02551	KZV27442.1	KV010635.1	858704	863357	pyrophosphate-energized vacuolar membrane proton pump-like	GO:0016021//integral component of membrane	GO:0046872//metal ion binding;GO:0015405//P-P-bond-hydrolysis-driven transmembrane transporter activity;GO:0016462//pyrophosphatase activity	GO:0006818//hydrogen transport	K01507//inorganic pyrophosphatase [EC:3.6.1.1]	gi|747074194|ref|XP_011084078.1|//PREDICTED: pyrophosphate-energized vacuolar membrane proton pump-like [Sesamum indicum]
	lcl|KV018098.1_mrna_41121	F511_01639	KZV17830.1	KV018098.1	996611	1001448	hypothetical protein	NA	NA	GO:0050794//regulation of cellular process;GO:0006351//transcription, DNA-templated	K02957//small subunit ribosomal protein S15Ae;K14484//auxin-responsive protein IAA	gi|747087163|ref|XP_011091113.1|//PREDICTED: auxin-responsive protein IAA14 [Sesamum indicum];gi|763816942|gb|KJB83794.1|//hypothetical protein B456_013G265000 [Gossypium raimondii]
	lcl|KV014877.1_mrna_37072	F511_02880	KZV21722.1	KV014877.1	338193	341680	hypothetical protein	NA	NA	NA	K10635//E3 ubiquitin-protein ligase Arkadia [EC:2.3.2.27]	gi|747098035|ref|XP_011097006.1|//PREDICTED: uncharacterized protein LOC105176030 [Sesamum indicum]
	lcl|KV016695.1_mrna_39360	F511_31841	KZV19471.1	KV016695.1	54714	57382	pre-mRNA-splicing factor 38	NA	NA	NA	K12849//pre-mRNA-splicing factor 38A	gi|747080399|ref|XP_011087450.1|//PREDICTED: pre-mRNA-splicing factor 38 [Sesamum indicum]
	lcl|KV014967.1_mrna_37761	F511_32205	KZV21076.1	KV014967.1	19131	22706	hypothetical protein	NA	GO:0016813//hydrolase activity, acting on carbon-nitrogen (but not peptide) bonds, in linear amidines	GO:0008152//metabolic process	K18151//ureidoglycolate amidohydrolase [EC:3.5.1.116]	gi|747087233|ref|XP_011091149.1|//PREDICTED: ureidoglycolate hydrolase [Sesamum indicum]
	lcl|KV002481.1_mrna_21016	F511_31479	KZV37826.1	KV002481.1	89504	92252	putative serine/threonine-protein kinase	NA	GO:0004674//protein serine/threonine kinase activity;GO:0032559//adenyl ribonucleotide binding;GO:0004871//signal transducer activity	GO:0006464//cellular protein modification process	K04733//interleukin-1 receptor-associated kinase 4 [EC:2.7.11.1];K04730//interleukin-1 receptor-associated kinase 1 [EC:2.7.11.1]	gi|747090827|ref|XP_011093121.1|//PREDICTED: probable serine/threonine-protein kinase At1g01540 [Sesamum indicum]
	lcl|KQ988193.1_mrna_2351	F511_22314	KZV56506.1	KQ988193.1	161454	163699	peptidyl-tRNA hydrolase%2C chloroplastic-like	GO:0044424//intracellular part	NA	GO:0010467//gene expression	K01056//peptidyl-tRNA hydrolase, PTH1 family [EC:3.1.1.29]	gi|747053536|ref|XP_011072935.1|//PREDICTED: peptidyl-tRNA hydrolase, mitochondrial [Sesamum indicum]
	lcl|KQ992527.1_mrna_8650	F511_27579	KZV50189.1	KQ992527.1	61163	62237	vacuolar amino acid transporter 1-like	NA	NA	NA	K15015//solute carrier family 32 (vesicular inhibitory amino acid transporter)	gi|747101034|ref|XP_011098630.1|//PREDICTED: vacuolar amino acid transporter 1-like [Sesamum indicum]
	lcl|KQ995736.1_mrna_12868	F511_10670	KZV45980.1	KQ995736.1	219216	219500	hypothetical protein	NA	NA	NA	K14488//SAUR family protein	gi|747082417|ref|XP_011088528.1|//PREDICTED: auxin-induced protein X15-like [Sesamum indicum]
	lcl|KQ987720.1_mrna_1766	F511_05982	KZV57108.1	KQ987720.1	437936	439450	GDSL esterase/lipase	NA	GO:0016787//hydrolase activity	GO:0044238//primary metabolic process	K17604//zinc finger SWIM domain-containing protein 3;K01188//beta-glucosidase [EC:3.2.1.21];K00679//phospholipid:diacylglycerol acyltransferase [EC:2.3.1.158];K10396//kinesin family member 5;K10960//geranylgeranyl reductase [EC:1.3.1.83]	gi|747057346|ref|XP_011074971.1|//PREDICTED: GDSL esterase/lipase At1g33811-like [Sesamum indicum]
	lcl|KQ996452.1_mrna_13853	F511_32735	KZV44989.1	KQ996452.1	48193	48864	hypothetical protein	NA	NA	NA	NA	gi|747068294|ref|XP_011080898.1|//PREDICTED: uncharacterized protein LOC105164048 [Sesamum indicum]
	lcl|KQ996074.1_mrna_13353	F511_15852	KZV45485.1	KQ996074.1	134923	136085	hypothetical protein	NA	NA	NA	K12447//UDP-sugar pyrophosphorylase [EC:2.7.7.64];K14794//ribosomal RNA-processing protein 12;K08237//hydroquinone glucosyltransferase [EC:2.4.1.218];K17982//geranyllinalool synthase [EC:4.2.3.144];K01051//pectinesterase [EC:3.1.1.11]	gi|823251194|ref|XP_012458203.1|//PREDICTED: uncharacterized protein LOC105778997 [Gossypium raimondii]
