# Supplementary material for: DNA methylation-mediated modulation of rapid desiccation tolerance acquisition and dehydration stress memory in the resurrection plant Boea hygrometrica
Source: PLoS Genet. 2021 Apr 30;17(4):e1009549. doi: 10.1371/journal.pgen.1009549 (PMC8115786; doi:10.1371/journal.pgen.1009549)
Supplement: S11 Table. List of the primers used in this study — (XLSX) [file pgen.1009549.s023.xlsx]

## Sheet: Sheet1
Gene locus/Protein ID	Forward primer (5' to 3')	Reverse primer (5' to 3')	Length of product (bp)	Experiments
EF1α	CACCGTTGGGACGTTTTGC	GGCTGCTGCCTTAGTCACCTT	113	qPCR
18S rRNA	CTTAGTTGGTGGAGCGATTTG	CCTGTTATTGCCTCAAACTTCC	148	qPCR
F511_19808/KZV25428	ATTCCGCATCACGCCACCATC	CCGAAGGACCGAAGATTCCAAGG	125	qPCR
F511_11515/KZV22541	TGGTAATATCGTTCTCAGTGGTGGTT	ACATCTGCTGGAAGGTGCTAAGG	185	qPCR
F511_02551/KZV27442	GTCCGCTGCTCTTGTGTCTCTTG	CGACGCACTTCTTCAACCATCTTCA	192	qPCR
F511_02880/KZV21722	AGCGGCGGCAGCAAGATATTC	ACAGAGGCAGCATCGGTGGTTA	176	qPCR
F511_32205/KZV21076	GTCATCAACCTATCCACTCTCCTCTT	ACTTGCTAGTTCATCAATCTGTCTCTG	210	qPCR
F511_11567/KZV50790	CAGGCGATTGGAGGTGGTAATGG	CCGAGGTGAGCGTAGGAGTGAA	245	qPCR
F511_19059/KZV43515	GGTATGGCTAGTGCTACTGCTGTAA	GCATTCCAGTGAACTACACCAGGAT	230	qPCR
F511_27579/KZV50189	GCAATCGTATCCATAGCCACTAATGTC	TGAAGCCATAACTCCTGTAGCAGATAT	237	qPCR
F511_10670/KZV45980	GCTGATGTGCCGAAAGGACACT	TTGGTGCAAGGAATGGTCAGGC	176	qPCR
F511_32735/KZV44989	CCACGCTGACTATGAACTCCATCAA	GGACTCACAACCTCACCGATGAC	196	qPCR
F511_01342/KZV54544	GAGAGGAACGCCGAGAAGCT	CTGTAGAGATCAGCCTTTGGATGC	200	qPCR
F511_01639/KZV17830	GAATATGTACCAATCCTACCAACAACTCTC	AGCATCCAGTCACCATCCTTATCTTC	183	qPCR
F511_31841/KZV19471	GTTCGTGTGCTAGGTGCCTTCTAT	GAGTAATCTCTGGTCAGGAGTTCATCAA	176	qPCR
F511_31479/KZV37826	TGGAGCCGACACTGGTTCATT	CCATATCCACCTTCACCAATCACATT	147	qPCR
F511_22314/KZV56506	AATGCCAGCGGTGAGTCTGTTG	GCCTTCCGATGCCTATCCGTAGA	214	qPCR
F511_05982/KZV57108	GGAAGCAACGACTACCTCAACAACTA	GTCCAACTGATGTCACCACCACTT	166	qPCR
F511_15852/KZV45485	CTCACAATACCAGCCATGAACACAATC	GAGCATTAGCACCACTGTCCAAGAT	204	qPCR
F511_01639/KZV17830	GAAGGTAAYTTTGTGTTGTYTAYT	TCARTRTCCTTCARATTCARTT	325	BSP
F511_32205/KZV21076	GAGTGGGTGAYTGAATTYAGYT	AARAAAARCCCCAAAATRRAAC	442	BSP
